# Supplementary material for: The effectiveness of app‐based mobile interventions on nutrition behaviours and nutrition‐related health outcomes: A systematic review and meta‐analysis
Source: PubMed Central journal article supplement — Obes Rev. 2019 Jul 28;20(10):1465–84. doi: 10.1111/obr.12903 (PMC6852183; doi:10.1111/obr.12903), 2019-07-28
Supplement: OBR-20-1465-s001.pdf [file OBR-20-1465-s001.pdf]

**The effectiveness of app-based mobile interventions on nutrition behaviours and  
nutrition-related health outcomes: A systematic review and meta-analysis**

*Karoline Villinger\*, Deborah R. Wahl\*, Heiner Boeing, Harald T. Schupp, & Britta Renner§*

*\*joint first authorship; §corresponding author*

Karoline Villinger, M.Sc.

University of Konstanz

Department of Psychology, Psychological Assessment and Health Psychology

Karoline.villinger@uni-konstanz.de

Deborah R. Wahl, M.Sc

University of Konstanz

Department of Psychology, Psychological Assessment and Health Psychology

Deborah.wahl@uni-konstanz.de

Heiner Boeing, Prof. Dr.

German Institute of Human Nutrition

Department of Epidemiology

Boeing@dife.de

Harald T. Schupp, Prof. Dr.

University of Konstanz

Department of Psychology, General and Biological Psychology

Harald.schupp@uni-konstanz.de

*Corresponding author:*

Britta Renner§, Prof. Dr.

University of Konstanz

Department of Psychology, Psychological Assessment and Health Psychology

P.O. Box 47, D-78457 Konstanz

Britta.renner@uni-konstanz.de

+49 7531 88 4679

## Supporting Information

### Review

**SI 1:** PRISMA checklist

**SI 2:** Search strategy

**SI 3:** List of excluded studies and reasons ( $k = 60$ )

**SI 4:** CONSORT 2010 checklist with definitions

**SI 5:** Cochrane risk of bias assessment across studies

**SI 6:** Cochrane risk of bias assessment for each study

**SI 7:** Behaviour Change Techniques (BCTs) for each study

**SI 8:** Detailed description of included studies and analysed outcomes

### Meta-analysis

**SI 9:** Funnel plot

**SI 10:** Meta-regression and moderation effect results

**SI 11:** Effect sizes (Cohen's  $d$ ) for all analysis levels and outcomes

**SI 12:** Effect sizes (Hedges'  $g$ ) for all analysis levels and outcomes

**SI 13:** Forest plots for outcomes (I. Nutrition behaviours, Figure 13.1, 13.2; II. Nutrition-related health outcomes, Figure 13.3 – 13.9)

**SI 14:** Weighted mean differences for BMI (Table 14.1) and body weight (Table 14.2)

## Supporting Information 1

### PRISMA checklist<sup>49</sup>

| Section/topic             | # | Checklist item                                                                                                                                                                                                                                                                                              | Item fulfilled                                                                     |
|---------------------------|---|-------------------------------------------------------------------------------------------------------------------------------------------------------------------------------------------------------------------------------------------------------------------------------------------------------------|------------------------------------------------------------------------------------|
| <b>TITLE</b>              |   |                                                                                                                                                                                                                                                                                                             |                                                                                    |
| Title                     | 1 | Identify the report as a systematic review, meta-analysis, or both.                                                                                                                                                                                                                                         | yes                                                                                |
| <b>ABSTRACT</b>           |   |                                                                                                                                                                                                                                                                                                             |                                                                                    |
| Structured summary        | 2 | Provide a structured summary including, as applicable: background; objectives; data sources; study eligibility criteria, participants, and interventions; study appraisal and synthesis methods; results; limitations; conclusions and implications of key findings; systematic review registration number. | yes                                                                                |
| <b>INTRODUCTION</b>       |   |                                                                                                                                                                                                                                                                                                             |                                                                                    |
| Rationale                 | 3 | Describe the rationale for the review in the context of what is already known.                                                                                                                                                                                                                              | yes                                                                                |
| Objectives                | 4 | Provide an explicit statement of questions being addressed with reference to participants, interventions, comparisons, outcomes, and study design (PICOS).                                                                                                                                                  | yes                                                                                |
| <b>METHODS</b>            |   |                                                                                                                                                                                                                                                                                                             |                                                                                    |
| Protocol and registration | 5 | Indicate if a review protocol exists, if and where it can be accessed (e.g., Web address), and, if available, provide registration information including registration number.                                                                                                                               | The review was conducted in accordance to a pre-defined but not published protocol |
| Eligibility criteria      | 6 | Specify study characteristics (e.g., PICOS, length of follow-up) and report characteristics (e.g., years considered, language, publication status) used as criteria for eligibility, giving rationale.                                                                                                      | yes                                                                                |
| Information sources       | 7 | Describe all information sources (e.g., databases with dates of coverage, contact with study authors to identify additional studies) in the search and date last searched.                                                                                                                                  | yes                                                                                |
| Search                    | 8 | Present full electronic search strategy for at least one database, including any limits used, such that it could be repeated.                                                                                                                                                                               | yes                                                                                |

|                                    |    |                                                                                                                                                                                                                        |     |
|------------------------------------|----|------------------------------------------------------------------------------------------------------------------------------------------------------------------------------------------------------------------------|-----|
| Study selection                    | 9  | State the process for selecting studies (i.e., screening, eligibility, included in systematic review, and, if applicable, included in the meta-analysis).                                                              | yes |
| Data collection process            | 10 | Describe method of data extraction from reports (e.g., piloted forms, independently, in duplicate) and any processes for obtaining and confirming data from investigators.                                             | yes |
| Data items                         | 11 | List and define all variables for which data were sought (e.g., PICOS, funding sources) and any assumptions and simplifications made.                                                                                  | yes |
| Risk of bias in individual studies | 12 | Describe methods used for assessing risk of bias of individual studies (including specification of whether this was done at the study or outcome level), and how this information is to be used in any data synthesis. | yes |
| Summary measures                   | 13 | State the principal summary measures (e.g., risk ratio, difference in means).                                                                                                                                          | yes |
| Synthesis of results               | 14 | Describe the methods of handling data and combining results of studies, if done, including measures of consistency (e.g., $I^2$ ) for each meta-analysis.                                                              | yes |
| Risk of bias across studies        | 15 | Specify any assessment of risk of bias that may affect the cumulative evidence (e.g., publication bias, selective reporting within studies).                                                                           | yes |
| Additional analyses                | 16 | Describe methods of additional analyses (e.g., sensitivity or subgroup analyses, meta-regression), if done, indicating which were pre-specified.                                                                       | yes |
| <b>RESULTS</b>                     |    |                                                                                                                                                                                                                        |     |
| Study selection                    | 17 | Give numbers of studies screened, assessed for eligibility, and included in the review, with reasons for exclusions at each stage, ideally with a flow diagram.                                                        | yes |
| Study characteristics              | 18 | For each study, present characteristics for which data were extracted (e.g., study size, PICOS, follow-up period) and provide the citations.                                                                           | yes |
| Risk of bias within studies        | 19 | Present data on risk of bias of each study and, if available, any outcome level assessment (see item 12).                                                                                                              | yes |
| Results of individual studies      | 20 | For all outcomes considered (benefits or harms), present, for each study: (a) simple summary data for each intervention group (b) effect estimates and confidence intervals, ideally with a forest plot.               | yes |
| Synthesis of results               | 21 | Present results of each meta-analysis done, including confidence intervals and measures of consistency.                                                                                                                | yes |
| Risk of bias across studies        | 22 | Present results of any assessment of risk of bias across studies (see Item 15).                                                                                                                                        | yes |

|                     |    |                                                                                                                                                                                      |     |
|---------------------|----|--------------------------------------------------------------------------------------------------------------------------------------------------------------------------------------|-----|
| Additional analysis | 23 | Give results of additional analyses, if done (e.g., sensitivity or subgroup analyses, meta-regression [see Item 16]).                                                                | yes |
| <b>DISCUSSION</b>   |    |                                                                                                                                                                                      |     |
| Summary of evidence | 24 | Summarize the main findings including the strength of evidence for each main outcome; consider their relevance to key groups (e.g., healthcare providers, users, and policy makers). | yes |
| Limitations         | 25 | Discuss limitations at study and outcome level (e.g., risk of bias), and at review-level (e.g., incomplete retrieval of identified research, reporting bias).                        | yes |
| Conclusions         | 26 | Provide a general interpretation of the results in the context of other evidence, and implications for future research.                                                              | yes |
| <b>FUNDING</b>      |    |                                                                                                                                                                                      |     |
| Funding             | 27 | Describe sources of funding for the systematic review and other support (e.g., supply of data); role of funders for the systematic review.                                           | yes |

## Supporting Information 2

Search strategy with general search terms used in the searches

| Search category | Search terms                                                                                                                                                                                                                                                                                                                                                                                                                                                                                       |
|-----------------|----------------------------------------------------------------------------------------------------------------------------------------------------------------------------------------------------------------------------------------------------------------------------------------------------------------------------------------------------------------------------------------------------------------------------------------------------------------------------------------------------|
| App             | ambulatory assessment OR ecological momentary assessment OR EMA OR mHealth OR mobile health OR smartphone OR smart phone OR smartphone intervention OR smartphone application OR mobile application OR smartphone app OR mobile app OR mobile intervention OR mobile technology OR mobile technologies OR mobile phone OR mobile device                                                                                                                                                            |
| Outcomes        | healthy eating OR diet OR dietary OR food OR foods OR nutrition OR eating OR fruit OR fruits OR vegetable OR vegetables OR snack OR snacks OR snacking OR energy intake OR calorie intake OR caloric intake OR dietary intake OR dietary behavior OR food intake OR nutrient intake OR nutritional intake OR BMI OR body mass index OR adiposity OR weight OR body weight OR weight management OR weight loss OR weight reduction OR obesity OR obese OR health behavior OR health behavior change |
| Terms excluded  | anti endomysial antibody OR IgA-endomysium antibodies OR eugenyl methacrylate OR epithelial membrane antigen OR ethylmethacrylate OR European Medicines Agency OR serum endomysial antibodies OR mental health                                                                                                                                                                                                                                                                                     |

### *MEDLINE and Web of Science*

Search Term:

TOPIC: ((ambulatory assessment OR ecological momentary assessment OR EMA OR mHealth OR mobile health OR smartphone OR smart phone OR smartphone intervention OR smartphone application OR mobile application OR smartphone app OR mobile app OR mobile intervention OR mobile technology OR mobile technologies OR mobile phone OR mobile device) AND (healthy eating OR diet OR dietary OR food OR foods OR nutrition OR eating OR fruit OR fruits OR vegetable OR vegetables OR snack OR snacks OR snacking OR energy intake OR calorie intake OR caloric intake OR dietary intake OR dietary behavior OR food intake OR nutrient intake OR nutritional intake OR BMI OR body mass index OR adiposity OR weight OR body weight OR weight management OR weight loss OR weight reduction OR obesity OR obese OR health behavior OR health behavior change) NOT (anti endomysial antibody OR IgA-endomysium antibodies OR eugenyl methacrylate OR epithelial membrane antigen OR ethylmethacrylate OR European Medicines Agency OR serum endomysial antibodies OR mental health))

Limits:

- Publication date: 01/01/2006 – 01/06/2017
- Language: English
- Search for: Topic

Hits:

- $k = 8,765$

*PubMed*

Search Term:

((ambulatory assessment[Title/Abstract] OR ecological momentary assessment[Title/Abstract] OR EMA[Title/Abstract] OR mHealth[Title/Abstract] OR mobile health[Title/Abstract] OR smartphone[Title/Abstract] OR smart phone[Title/Abstract] OR smartphone intervention[Title/Abstract] OR smartphone application[Title/Abstract] OR mobile application[Title/Abstract] OR smartphone app[Title/Abstract] OR mobile app[Title/Abstract] OR mobile intervention[Title/Abstract] OR mobile technology[Title/Abstract] OR mobile technologies[Title/Abstract] OR mobile phone[Title/Abstract] OR mobile device[Title/Abstract])) AND (healthy eating[Title/Abstract] OR diet[Title/Abstract] OR dietary[Title/Abstract] OR food[Title/Abstract] OR foods[Title/Abstract] OR nutrition[Title/Abstract] OR eating[Title/Abstract] OR fruit[Title/Abstract] OR fruits[Title/Abstract] OR vegetable[Title/Abstract] OR vegetables[Title/Abstract] OR snack[Title/Abstract] OR snacks[Title/Abstract] OR snacking[Title/Abstract] OR energy intake[Title/Abstract] OR calorie intake[Title/Abstract] OR caloric intake[Title/Abstract] OR dietary intake[Title/Abstract] OR dietary behavior[Title/Abstract] OR food intake[Title/Abstract] OR nutrient intake[Title/Abstract] OR nutritional intake[Title/Abstract] OR BMI[Title/Abstract] OR body mass index[Title/Abstract] OR adiposity[Title/Abstract] OR weight[Title/Abstract] OR body weight[Title/Abstract] OR weight management[Title/Abstract] OR weight loss[Title/Abstract] OR weight reduction[Title/Abstract] OR obesity[Title/Abstract] OR obese[Title/Abstract] OR health behavior[Title/Abstract] OR health behavior change[Title/Abstract])) NOT (anti endomysial antibody[Title/Abstract] OR IgA-endomysium antibodies[Title/Abstract] OR eugenyl methacrylate[Title/Abstract] OR epithelial membrane antigen[Title/Abstract] OR ethylmethacrylate[Title/Abstract] OR European Medicines Agency[Title/Abstract] OR serum endomysial antibodies[Title/Abstract] OR mental health[Title/Abstract])

Limits:

- Publication date: 01/01/2006 – 01/06/2017
- Language: English
- Search for: Title and abstract

Hits:

- $k = 1,679$

*PsychInfo, PsychIndex, PsychArticle, SPORTDiscuss*

Search Term:

(ambulatory assessment OR ecological momentary assessment OR EMA OR mHealth OR mobile health OR smartphone OR smart phone OR smartphone intervention OR smartphone application OR mobile application OR smartphone app OR mobile app OR mobile intervention OR mobile technology OR mobile technologies OR mobile phone OR mobile device ) AND ( healthy eating OR diet OR dietary OR food OR foods OR nutrition OR eating OR fruit OR fruits OR vegetable OR vegetables OR snack OR snacks OR snacking OR energy intake OR calorie intake OR caloric intake OR dietary intake OR dietary behavior OR food intake OR nutrient intake OR nutritional intake OR BMI OR body mass index OR adiposity OR weight OR body weight OR weight management OR weight loss OR weight reduction OR obesity OR obese OR health behavior OR health behavior change ) NOT ( anti endomysial antibody OR IgA-endomysium antibodies OR eugenyl methacrylate OR epithelial membrane antigen OR ethylmethacrylate OR European Medicines Agency OR serum endomysial antibodies OR mental health)

Limits:

- Publication date: 01/01/2006 – 01/06/2017
- Language: English
- Search for: All fields

Hits:

- $k = 1,263$



### Supporting Information 3

List of excluded studies and reasons ( $k = 60$ )

#### ***k = 19: No app or automated feedback***

Allman-Farinelli M, Partridge SR, McGeechan K, et al. A mobile health lifestyle program for prevention of weight gain in young adults (TXT2BFiT): Nine-month outcomes of a randomized controlled trial. *JMIR mHealth and uHealth* 2016; **4**(2): e78. doi: 10.2196/mhealth.5768.

Bentley CL, Otesile O, Bacigalupo R, et al. Feasibility study of portable technology for weight loss and HbA1c control in type 2 diabetes. *BMC Medical Informatics and Decision Making* 2016; **16**(92). doi: 10.1186/s12911-016-0331-2.

Blackburne T, Rodriguez A, Johnstone SJ. A serious game to increase healthy food consumption in overweight or obese adults: Randomized controlled trial. *JMIR Serious Games* 2016; **4**(2): e10. doi: 10.2196/games.5708.

Burke LE, Styn MA, Sereika SM, et al. Using mHealth technology to enhance self-monitoring for weight loss: A randomized trial. *American Journal of Preventive Medicine* 2012; **43**(1): 20-26. doi: 10.1016/j.amepre.2012.03.016.

Ni Mhurchu C, Whittaker R, McRobbie H, et al. Feasibility, acceptability and potential effectiveness of a mobile health (mHealth) weight management programme for New Zealand adults. *BMC Obesity* 2014; **1**(10). doi: 10.1186/2052-9538-1-10.

O'Brien T. *Mobile health technology interventions to improve the health status of older rural women*. (Doctoral dissertation, Medical University of South Carolina); South Carolina, 2013.

Sysko R. Comment on: Feasibility of ecological momentary assessment to characterize adolescent postoperative diet and activity patterns following weight loss surgery. *Surgery for Obesity and Related Diseases: Official Journal of the American Society for Bariatric Surgery* 2014; **10**(4): 711-2. doi: 10.1016/j.soard.2014.02.012.

Waki K, Fujita H, Uchimura Y, et al. DialBetics: A novel smartphone-based self-management support system for type 2 diabetes patients. *Journal of Diabetes Science and Technology* 2014; **8**(2): 209-15. doi: 10.1177/1932296814526495.

Nystrom CD, Sandin S, Henriksson P, et al. Mobile-based intervention intended to stop obesity in preschool-aged children: The MINISTOP randomized controlled trial. *The American Journal of Clinical Nutrition* 2017, **105**(6): 1327-35. doi: 10.3945/ajcn.116.150995.

Byrne S, Gay G, Pollack JP, et al. Caring for mobile phone-based virtual pets can influence youth eating behaviors. *Journal of Children and Media* 2012; **6**(1): 83-99. doi: 10.1080/17482798.2011.633410.

Zhou WB, Chen M, Yuan JY, Sun Y. Welltang - A smartphone-based diabetes management application improves blood glucose control in Chinese people with diabetes. *Diabetes Research and Clinical Practice* 2016; **116**: 105-10. doi: 10.1016/j.diabres.2016.03.018.

Ambeba EJ, Ye L, Sereika SM, et al. The use of mHealth to deliver tailored messages reduces reported energy and fat intake. *Journal of Cardiovascular Nursing* 2015; **30**(1): 35-43. doi: 10.1097/JCN.0000000000000120.

Hutcheson TD. *Using mobile technology to impact fruit and vegetable consumption in low-income youth*. (Doctoral dissertation, University of Kansas); Kansas, 2012.

Nollen NL, Hutcheson T, Carlson S, et al. Development and functionality of a handheld computer program to improve fruit and vegetable intake among low-income youth. *Health Education Research* 2013; **28**(2): 249-64. doi: 10.1093/her/cys099.

Nollen NL, Mayo MS, Carlson SE, Rapoff MA, Goggin KJ, Ellerbeck EF. Mobile technology for obesity prevention: A randomized pilot study in racial- and ethnic-minority girls. *American Journal of Preventive Medicine* 2014; **46**(4): 404-08. doi: 10.1016/j.amepre.2013.12.011.

Schneider KL, Coons MJ, McFadden HG, et al. Mechanisms of change in diet and activity in the Make Better Choices 1 trial. *Health Psychology* 2016; **35**(7): 723-32. doi: 10.1037/hea0000333.

Spring B, Duncan JM, Janke EA, et al. Integrating technology into standard weight loss treatment: A randomized controlled trial. *JAMA Internal Medicine* 2013; **173**(2): 105-11. doi: 10.1001/jamainternmed.2013.1221.

Spring B, Schneider K, McFadden G, et al. Multiple behavior changes in diet and activity: A randomized controlled trial using mobile technology. *Archives of Internal Medicine* 2012; **172**(10): 789-96. doi: 10.1001/archinternmed.2012.1044.

Welch JL, Astroth KS, Perkins SM, et al. Using a mobile application to self-monitor diet and fluid intake among adults receiving hemodialysis. *Research in Nursing & Health* 2013; **36**(3): 284-98. doi: 10.1002/nur.21539.

**k = 10: No results reported / no study conducted**

Arsand E, Varmedal R, Hartvigsen G. Usability of a mobile self-help tool for people with diabetes: The Easy Health Diary. In: *2007 IEEE International Conference on Automation Science and Engineering*. Scottsdale, AZ: IEEE; 2007. pp. 863–868. doi: 10.1109/COASE.2007.4341807.

Bojic M, Blanson Henkemans OA, Neerinx MA, Van der Mast CA, Lindenberg J. Effects of multimodal feedback on the usability of mobile diet diary for older adults. In: Stephanidis C (ed). *Universal Access in Human-Computer Interaction. Applications and Services*. Berlin: Springer; 2009. pp. 293–302. doi: 10.1007/978-3-642-02713-0\_31.

De Cock N, Vangeel J, Lachat C, et al. Use of fitness and nutrition apps: Associations with body mass index, snacking, and drinking habits in adolescents. *JMIR mHealth and uHealth* 2017; **5**(4): e58. doi: 10.2196/mhealth.6005.

Ernsting C, Dombrowski SU, Oedekoven M, et al. Using smartphones and health apps to change and manage health behaviors: A population-based survey. *Journal of Medical Internet Research* 2017; **19**(4): e101. doi: 10.2196/jmir.6838.

Gao CM, Kong FY, Tan JD. HealthAware: Tackling obesity with health aware smart phone systems. *Proceedings of the IEEE International Conference on Robotics and Biomimetics* 2009; 1549-54. doi: 10.1109/ROBIO.2009.5420399.

Kato S, Waki K, Nakamura S, et al. Validating the use of photos to measure dietary intake: The method used by DialBetics, a smartphone-based self-management system for diabetes patients. *Diabetology International* 2016; **7**: 244–251. doi: 10.1007/s13340-015-0240-0.

Putri RCRW. NomNom, mobile app about digestive health for children. In: *Global society and new media: International Conference on New Media 2015 Universitas Multimedia Nusantara, Indonesia, November 25th-27th*. Piscataway, NJ: IEEE; 2015. pp. 1–5. doi: 10.1109/CONMEDIA.2015.7449151.

Robinson E, Higgs S, Daley AJ, et al. Development and feasibility testing of a smart phone based attentive eating intervention. *BMC Public Health* 2013; **13**(639). doi: 10.1186/1471-2458-13-639.

Tommasone G, Bazzani M, Solinas V, Serafini P. Midwifery e-Health: From design to validation of “Mammastyle — Gravidanza Fisiologica”. In: *2016 IEEE 18th International Conference on e-Health Networking, Applications and Services (Healthcom)*. Piscataway, NJ: IEEE; 2016. pp. 1–6. doi: 10.1109/HealthCom.2016.7749499.

Youm S, Park SH. Development and evaluation of a mobile application for personal lifestyle check-up and improvement. *Telemedicine and E-Health* 2014; **20**(11): 1057-63. doi: 10.1089/tmj.2013.0335.

#### ***k* = 11: No intervention**

Carter MC, Burley VJ, Cade JE. Weight loss associated with different patterns of self-monitoring using the mobile phone app my meal mate. *Journal of Medical Internet Research* 2017; **5**(2): e8. doi: 10.2196/mhealth.4520.

Chung AE, Skinner AC, Hasty SE, Perrin EM. Tweeting to health: A novel mHealth intervention using fitbits and twitter to foster healthy lifestyles. *Clinical Pediatrics* 2017; **56**: 26-32. doi: 0.1177/0009922816653385.

Diouri O, Place J, Traverso M, Renard E. Development of a mobile application to compute food carbohydrates and first evaluation in patients with insulin-treated diabetes. *Diabetes Technology & Therapeutics* 2015; **17**: A24.

Gilliland J, Sadler R, Clark A, O'Connor C, Milczarek M, Doherty S. Using a smartphone application to promote healthy dietary behaviours and local food consumption. *BioMed Research International* 2015. doi: 10.1155/2015/841368.

Guo SHM, Chang HK, Lin CY. Impact of mobile diabetes self-care system on patients' knowledge, behavior and efficacy. *Computers in Industry* 2015; **69**: 22-29. doi: 10.1016/j.compind.2014.11.001.

Kerr DA, Harray AJ, Pollard CM, et al. The connecting health and technology study: A 6-month randomized controlled trial to improve nutrition behaviours using a mobile food record and text messaging support in young adults. *International Journal of Behavioral Nutrition and Physical Activity* 2016; **13**(52). doi: 10.1186/s12966-016-0376-8.

Mameli C, Brunetti D, Colombo V, et al. Combined use of a wristband and a smartphone to reduce body weight in obese children: randomized controlled trial. *Pediatric obesity* 2016; **13**(2): 81-87. doi: 10.1111/ijpo.12201.

Miller CK, Weinhold KR, Mitchell DC. Using Ecological Momentary Assessment to track goal progress toward the adoption of a low glycemic index diet among adults with type 2 diabetes: A pilot study. *Topics in Clinical Nutrition* 2016; **31**(4): 323-34. doi: 10.1097/TIN.0000000000000083.

Pretlow RA, Stock CM, Allison S, Roeger L. Treatment of child/adolescent obesity using the addiction model: A smartphone app pilot study. *Childhood Obesity* 2015; **11**(3): 248-59. doi: 10.1089/chi.2014.0124.

Turner-McGrievy GM, Davidson CR, Wilcox S. Does the type of weight loss diet affect who participates in a behavioral weight loss intervention? A comparison of participants for a plant-based diet versus a standard diet trial. *Appetite* 2014; **73**: 156-62. doi: 10.1016/j.appet.2013.11.008.

Ashman AM, Collins CE, Brown LJ, Rae KM, Rollo ME. A brief tool to assess image-based dietary records and guide nutrition counselling among pregnant women: An evaluation. *JMIR mHealth and uHealth* 2016; **4**(4): e123. doi: 10.2196/mhealth.6469.

**k = 1: No nutrition related outcome targeted**

Martin CK, Miller AC, Thomas DM, Champagne CM, Han H, Church T. Efficacy of Smart LossSM, a smartphone-based weight loss intervention: Results from a randomized controlled trial. *Obesity* 2015; **23**(5): 935-42. doi: 10.1002/oby.21063

**k = 17: Abstract / proposal / statement**

Adachi M, Fujimoto T. SDSS: Proposal on feeding support application software which enables the user to create a state of “mental alertness”. In: Ito T (eds). *2015 IEEE/ACIS 14th International Conference on Computer and Information Science (ICIS)*. Piscataway, NJ: IEEE; 2015. pp. 513–518. doi: 10.1109/ICIS.2015.7166646.

Ainscough K, Kennelly M, Lindsay KL, O'Sullivan EJ, McAuliffe FM. Impact of an mHealth supported healthy lifestyle intervention on behavioural stage of change in overweight and obese pregnancy. *Proceedings of the Nutrition Society* 2016; **75**(OCE3): E85. doi: 10.1017/S0029665116001002.

Briassoulis G, Meyer R. A multidisciplinary mobile nutritional assessment model for family-supported dietary optimization in home-ventilated children. *Pediatric Critical Care Medicine* 2015; **16**(6): 596-98. doi: 10.1097/PCC.0000000000000457.

Khan DU. Design and evaluation of a mobile snack application for low socioeconomic status families. *Computer Science Graduate Theses & Dissertations* 2013; 78.

Spring B, Pellegrini CA, McFadden HG, Pfammatter A, Siddique J, Hedeker D. Clinical trial of a mobile health intervention for simultaneous versus sequential diet and activity change. *Circulation* 2015; **132**(23): 2270.

Struempfer B, Parmer SM, Funderburk K. Use of blended learning to improve nutrition knowledge in third-graders. *Journal of Nutrition Education & Behavior* 2016; **48**(7): 510-11.e1. doi: 10.1016/j.jneb.2016.04.401.

Watterson T. Changes in attitudes and behaviors toward physical activity, nutrition, and social support for middle school students using the AFIT app as a supplement to instruction in a physical education class. *Graduate Theses and Dissertations* 2012.

Bender MS, Cooper B, Arai S. A feasible and effective mobile health weight loss lifestyle intervention for Filipinos with type 2 diabetes. *Circulation* 2017; **135**(10).

Fukuoka Y, Gay C, Joiner K, Vittinghoff E. A novel mobile phone delivered diabetes prevention program in overweight adults at risk for type 2 diabetes – A randomized controlled trial. *Circulation* 2014; **130**(2).

Goad K. My No-Diet Solution. *Health* 2011; **25**(5): 59.

Johnston C, Thompson-Felty C. Adherence to daily diet monitoring using one of three commercial diet apps via smartphones was associated with significant weight loss in healthy overweight adults irrespective of the diet app. *Feasibility Journal* 2015; **29**(1): 597-8.

Kaipainen K. *Design and evaluation of online and mobile applications for stress management and healthy eating*. Tampere, Finland; 2014.

Mosqueda MI, Martinez CL, Orr BJ, Merchant NC, Going SB, Hongu N. A nutrition and physical activity intervention using smart phones in physical education classes at a junior high school. *Feasibility Journal* 2012; **26**(1): 257.

Steinbach P. Sooner in life. *Athletic Business* 2011; **35**: 61-62.

Webster ST. Beat holiday pounds with a few ounces of prevention. *IDEA Food and Nutrition Tips* 2012; **1**(7).

Widmer RJ, Allison TG, Lopez-Jimenez F, Lennon R, Lerman LO, Lerman A. digital health intervention during cardiac rehabilitation reduces emergency department visits and improves weight loss: A randomized controlled trial. *Circulation* 2016; **134**(1).

Xu CH, Zhu J, Li ZX, Xiao J, Huang CQ, Tang Y. SHMS: A Smartphone self-health management system using data mining. In: Cui B, Zhang N, Xu J, Lian X, Liu D (eds.). *Web-Age Information Management, Pt II* 2016; 521-23.

**k = 2: Insufficient data/method for assessing eating behavior in app**

Elbert SP, Dijkstra A, Oenema A. A mobile phone app intervention targeting fruit and vegetable consumption: The efficacy of textual and auditory tailored health information tested in a randomized controlled trial. *Journal of Medical Internet Research* 2016; **18**(6): e147. doi: 10.2196/jmir.5056.

Du H, Venkatakrisnan A, Youngblood GM, Ram A, Pirolli P. A group-based mobile application to increase adherence in exercise and nutrition programs: A factorial design feasibility study. *JMIR mHealth and uHealth* 2016; **4**(1): e4. doi: 10.2196/mhealth.4900.

## Supporting Information 4

CONSORT 2010 checklist<sup>50</sup> with definitions

All items were coded in duplicate by two independent reviewers with 0 = item not fulfilled, 0.5 = item only partially fulfilled, 1 = item fulfilled, NA = not applicable to the study.

| #                         | Item                       | Definition                                                                                                                                                                                  |
|---------------------------|----------------------------|---------------------------------------------------------------------------------------------------------------------------------------------------------------------------------------------|
| <b>Title and Abstract</b> |                            |                                                                                                                                                                                             |
| 1a                        |                            | Identification as a randomized trial in the title                                                                                                                                           |
| 1b                        |                            | Structured summary of trial design, methods, results, and conclusions                                                                                                                       |
| <b>Introduction</b>       |                            |                                                                                                                                                                                             |
| 2a                        | Background & objectives    | Scientific background and explanation of rationale                                                                                                                                          |
| 2b                        |                            | Specific objectives or hypotheses                                                                                                                                                           |
| <b>Methods</b>            |                            |                                                                                                                                                                                             |
| 3a                        | Trial design               | Description of trial design (such as parallel, factorial) including allocation ratio                                                                                                        |
| 3b                        |                            | Important changes to methods after trial commencement (such as eligibility criteria), with reasons                                                                                          |
| 4a                        | Participants               | Eligibility criteria for participants                                                                                                                                                       |
| 4b                        |                            | Settings and locations where the data were collected                                                                                                                                        |
| 5                         | Interventions              | The interventions for each group with sufficient details to allow replication, including how and when they were actually administered                                                       |
| 6a                        | Outcomes                   | Completely defined pre-specified primary and secondary outcome measures, including how and when they were assessed                                                                          |
| 6b                        |                            | Any changes to trial outcomes after the trial commenced, with reasons                                                                                                                       |
| 7a                        | Sample size                | How sample size was determined                                                                                                                                                              |
| 7b                        |                            | When applicable, explanation of any interim analyses and stopping guidelines                                                                                                                |
| 8a                        | Random sequence generation | Method used to generate the random allocation sequence                                                                                                                                      |
| 8b                        |                            | Type of randomization; details of any restriction (such as blocking and block size)                                                                                                         |
| 9                         | Allocation concealment     | Mechanism used to implement the random allocation sequence (such as sequentially numbered containers), describing any steps taken to conceal the sequence until interventions were assigned |
| 10                        | Implementation             | Who generated the random allocation sequence, who enrolled participants, and who assigned participants to interventions                                                                     |
| 11a                       | Blinding                   | If done, who was blinded after assignment to interventions (for example, participants, care providers, those assessing outcomes) and how                                                    |
| 11b                       |                            | If relevant, description of the similarity of interventions                                                                                                                                 |

|                          |                         |                                                                                                                                                                              |
|--------------------------|-------------------------|------------------------------------------------------------------------------------------------------------------------------------------------------------------------------|
| 12a                      | Statistical methods     | Statistical methods used to compare groups for primary and secondary outcomes                                                                                                |
| 12b                      |                         | Methods for additional analyses, such as subgroup analyses and adjusted analyses                                                                                             |
| <b>Results</b>           |                         |                                                                                                                                                                              |
| 13a                      | Participant flow        | For each group, the numbers of participants who were randomly assigned, received intended treatment, and were analyzed for the primary outcome                               |
| 13b                      |                         | For each group, losses and exclusions after randomization, together with reasons                                                                                             |
| 14a                      | Recruitment             | Dates defining the periods of recruitment and follow-up                                                                                                                      |
| 14b                      |                         | Why the trial ended or was stopped                                                                                                                                           |
| 15                       | Baseline data           | A table showing baseline demographic and clinical characteristics for each group                                                                                             |
| 16                       | Numbers analysed        | For each group, number of participants (denominator) included in each analysis and whether the analysis was by original assigned groups                                      |
| 17a                      | Outcomes and estimation | For each primary and secondary outcome, results for each group, and the estimated effect size and its precision (such as 95% confidence interval)                            |
| 17b                      |                         | For binary outcomes, presentation of both absolute and relative effect sizes is recommended                                                                                  |
| 18                       | Ancillary analyses      | Results of any other analyses performed, including subgroup analyses and adjusted analyses, distinguishing pre-specified from exploratory                                    |
| 19                       | Harms                   | All important harms or unintended effects in each group                                                                                                                      |
| <b>Discussion</b>        |                         |                                                                                                                                                                              |
| 20                       | Limitations             | Trial limitations, addressing sources of potential bias, imprecision, and, if relevant, multiplicity of analyses                                                             |
| 21                       | Generalizability        | Generalizability (external validity, applicability) of the trial findings<br><i>Note. 1=mentioned and given, 0.5=mentioned and not given, 0=not mentioned</i>                |
| 22                       | Interpretation          | Interpretation consistent with results, balancing benefits and harms, and considering other relevant evidence                                                                |
| <b>Other information</b> |                         |                                                                                                                                                                              |
| 23                       | Registration            | Registration number and name of trial registry                                                                                                                               |
| 24                       | Protocol                | Where the full trial protocol can be accessed, if available<br><i>Note. 1=available &amp; accessible, 0=available but not accessible, NA=no protocol mentioned/available</i> |
| 25                       | Funding                 | Sources of funding and other support (such as supply of drugs), role of funders                                                                                              |

## Supporting Information 5

Cochrane risk of bias<sup>53,55</sup> assessment across studies

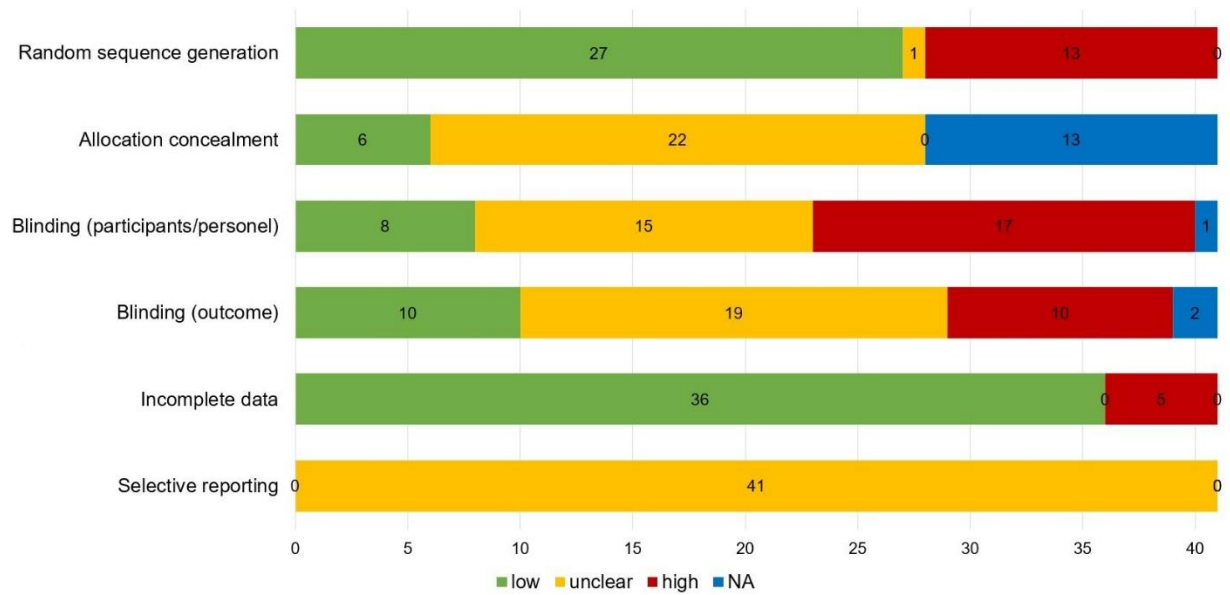



## Supporting Information 6

Cochrane risk of bias<sup>53,55</sup> assessment for each study

(H = high risk, U = unclear risk, L = low risk, NA = not applicable).

| Study                              | Random seq. generation | All. concealment | Blinding (part./pers.) | Blinding (outcome) | Incomplete data | Selective reporting |
|------------------------------------|------------------------|------------------|------------------------|--------------------|-----------------|---------------------|
| [69] Ahn et al., 2016              | H                      | NA               | U                      | U                  | L               | U                   |
| [70] Allen et al., 2013            | L                      | U                | U                      | U                  | L               | U                   |
| [71] Appel et al., 2014            | H                      | NA               | H                      | U                  | H               | U                   |
| [72] Balk-Møller et al., 2017      | L                      | L                | H                      | H                  | L               | U                   |
| [61] Block et al., 2015            | L                      | L                | H                      | L                  | L               | U                   |
| [73] Brindal et al., 2013          | L                      | U                | L                      | H                  | L               | U                   |
| [74] Brindal et al., 2016          | L                      | U                | U                      | U                  | L               | U                   |
| [75] Burke et al., 2017            | L                      | U                | U                      | U                  | L               | U                   |
| [76] Carter et al., 2013           | L                      | U                | H                      | L                  | L               | U                   |
| [77] Duncan et al., 2014           | L                      | U                | L                      | L                  | L               | U                   |
| [78] Froisland et al., 2012        | H                      | NA               | H                      | H                  | L               | U                   |
| [79] Fukuoka et al., 2015          | L                      | L                | H                      | L                  | L               | U                   |
| [80] Gilson et al., 2017           | H                      | NA               | H                      | U                  | H               | U                   |
| [81] Godino et al., 2016           | L                      | L                | H                      | L                  | L               | U                   |
| [82] Gordon et al., 2017           | H                      | NA               | U                      | U                  | L               | U                   |
| [83] Hales et al., 2016            | L                      | U                | H                      | H                  | L               | U                   |
| [84] Hebden et al., 2014           | L                      | U                | L                      | H                  | L               | U                   |
| [85] Holmen et al., 2014           | L                      | U                | H                      | H                  | L               | U                   |
| [86] Ipijan & Johnston, 2017       | L                      | U                | U                      | U                  | L               | U                   |
| [87] Jensen et al., 2016           | H                      | NA               | H                      | U                  | H               | U                   |
| [88] Johnston et al., 2013         | L                      | U                | U                      | U                  | L               | U                   |
| [89] Kim et al., 2017              | H                      | NA               | NA                     | U                  | L               | U                   |
| [90] Laing et al., 2014            | L                      | L                | L                      | H                  | H               | U                   |
| [91] Lee et al., 2010              | H                      | NA               | H                      | U                  | L               | U                   |
| [92] Mc Carroll et al., 2015       | H                      | NA               | U                      | U                  | H               | U                   |
| [93] Mummah et al., 2016           | L                      | U                | L                      | L                  | L               | U                   |
| [95] Partridge et al., 2015        | L                      | L                | L                      | L                  | L               | U                   |
| [94] Partridge et al., 2017        | U                      | U                | L                      | U                  | L               | U                   |
| [96] Rabbi et al., 2015            | L                      | U                | L                      | H                  | L               | U                   |
| [97] Recio-Rodriguez et al., 2016  | L                      | U                | H                      | L                  | L               | U                   |
| [98] Ross & Wing, 2016             | L                      | U                | H                      | L                  | L               | U                   |
| [99] Spring et al., 2017           | L                      | U                | H                      | L                  | L               | U                   |
| [100] Steinert et al., 2016        | H                      | NA               | U                      | U                  | L               | U                   |
| [101] Stephens et al., 2017        | L                      | U                | U                      | U                  | L               | U                   |
| [102] Svetkey et al., 2015         | L                      | U                | U                      | U                  | L               | U                   |
| [103] Thomas & Wing, 2013          | H                      | NA               | U                      | NA                 | L               | U                   |
| [104] Torbjønson et al., 2014      | L                      | U                | H                      | H                  | L               | U                   |
| [105] Turner-McGrievy & Tate, 2011 | L                      | U                | H                      | H                  | L               | U                   |
| [106] Wharton et al., 2014         | L                      | U                | U                      | U                  | L               | U                   |
| [107] Widmer et al., 2015          | H                      | NA               | U                      | U                  | L               | U                   |
| [108] Willey & Walsh, 2016         | H                      | NA               | U                      | NA                 | L               | U                   |

*Note.* Criterion for assessment of “incomplete outcome data”: high = >25%, low = <25% or intention-to-treat analysis, unclear = no data provided.

## Supporting Information 7

### Behaviour Change Techniques (BCTs) for each study

|                                    | 1 Goals and Planning         |                            | 2 Feedback and Monitoring     |                             |                           |                               |                 | 3 Social Support |               |                          |                       |                    | 4 Shaping Knowledge |            |                 | 5 Comparison of Behaviour |                        |    | 6 Prompts & Cues |   |   | 7 Reward and Threat |    |    | 8 Antecedents |   |   | 9 Self-Belief |   |   | 10 Verbal Persuasion |   |   |
|------------------------------------|------------------------------|----------------------------|-------------------------------|-----------------------------|---------------------------|-------------------------------|-----------------|------------------|---------------|--------------------------|-----------------------|--------------------|---------------------|------------|-----------------|---------------------------|------------------------|----|------------------|---|---|---------------------|----|----|---------------|---|---|---------------|---|---|----------------------|---|---|
|                                    | 1.1 Goal Setting (behaviour) | 1.2 Goal Setting (outcome) | 2.1 Self-Monitoring Behaviour | 2.2 Self-Monitoring Outcome | 2.3 Self-Monitoring Goals | 2.4 Self-Monitoring Behaviour | 3.1 Unspecified | 3.2 Practical    | 3.3 Emotional | 4.1 Performing Knowledge | 5.1 Social Comparison | 6.1 Prompts & Cues | 7.1 Reward          | 7.2 Threat | 8.1 Antecedents | 9.1 Self-Belief           | 10.1 Verbal Persuasion |    |                  |   |   |                     |    |    |               |   |   |               |   |   |                      |   |   |
| [69] Ahn et al., 2016              |                              |                            |                               |                             |                           |                               |                 |                  |               |                          |                       |                    |                     |            |                 |                           |                        |    |                  |   |   |                     |    |    |               |   |   |               |   |   |                      |   |   |
| [70] Allen et al., 2013            |                              |                            |                               |                             |                           |                               |                 |                  |               |                          |                       |                    |                     |            |                 |                           |                        |    |                  |   |   |                     |    |    |               |   |   |               |   |   |                      |   |   |
| [71] Appel et al., 2014            |                              |                            |                               |                             |                           |                               |                 |                  |               |                          |                       |                    |                     |            |                 |                           |                        |    |                  |   |   |                     |    |    |               |   |   |               |   |   |                      |   |   |
| [72] Balk-Møller et al., 2017      |                              |                            |                               |                             |                           |                               |                 |                  |               |                          |                       |                    |                     |            |                 |                           |                        |    |                  |   |   |                     |    |    |               |   |   |               |   |   |                      |   |   |
| [61] Block et al., 2015            |                              |                            |                               |                             |                           |                               |                 |                  |               |                          |                       |                    |                     |            |                 |                           |                        |    |                  |   |   |                     |    |    |               |   |   |               |   |   |                      |   |   |
| [73] Brindal et al., 2013          |                              |                            |                               |                             |                           |                               |                 |                  |               |                          |                       |                    |                     |            |                 |                           |                        |    |                  |   |   |                     |    |    |               |   |   |               |   |   |                      |   |   |
| [74] Brindal et al., 2016          |                              |                            |                               |                             |                           |                               |                 |                  |               |                          |                       |                    |                     |            |                 |                           |                        |    |                  |   |   |                     |    |    |               |   |   |               |   |   |                      |   |   |
| [75] Burke et al., 2017            |                              |                            |                               |                             |                           |                               |                 |                  |               |                          |                       |                    |                     |            |                 |                           |                        |    |                  |   |   |                     |    |    |               |   |   |               |   |   |                      |   |   |
| [76] Carter et al., 2013           |                              |                            |                               |                             |                           |                               |                 |                  |               |                          |                       |                    |                     |            |                 |                           |                        |    |                  |   |   |                     |    |    |               |   |   |               |   |   |                      |   |   |
| [77] Duncan et al., 2014           |                              |                            |                               |                             |                           |                               |                 |                  |               |                          |                       |                    |                     |            |                 |                           |                        |    |                  |   |   |                     |    |    |               |   |   |               |   |   |                      |   |   |
| [78] Froisland et al., 2012        |                              |                            |                               |                             |                           |                               |                 |                  |               |                          |                       |                    |                     |            |                 |                           |                        |    |                  |   |   |                     |    |    |               |   |   |               |   |   |                      |   |   |
| [79] Fukuoka et al., 2015          |                              |                            |                               |                             |                           |                               |                 |                  |               |                          |                       |                    |                     |            |                 |                           |                        |    |                  |   |   |                     |    |    |               |   |   |               |   |   |                      |   |   |
| [80] Gilson et al., 2017           |                              |                            |                               |                             |                           |                               |                 |                  |               |                          |                       |                    |                     |            |                 |                           |                        |    |                  |   |   |                     |    |    |               |   |   |               |   |   |                      |   |   |
| [81] Godino et al., 2016           |                              |                            |                               |                             |                           |                               |                 |                  |               |                          |                       |                    |                     |            |                 |                           |                        |    |                  |   |   |                     |    |    |               |   |   |               |   |   |                      |   |   |
| [82] Gordon et al., 2017           |                              |                            |                               |                             |                           |                               |                 |                  |               |                          |                       |                    |                     |            |                 |                           |                        |    |                  |   |   |                     |    |    |               |   |   |               |   |   |                      |   |   |
| [83] Hales et al., 2016            |                              |                            |                               |                             |                           |                               |                 |                  |               |                          |                       |                    |                     |            |                 |                           |                        |    |                  |   |   |                     |    |    |               |   |   |               |   |   |                      |   |   |
| [84] Hebden et al., 2014           |                              |                            |                               |                             |                           |                               |                 |                  |               |                          |                       |                    |                     |            |                 |                           |                        |    |                  |   |   |                     |    |    |               |   |   |               |   |   |                      |   |   |
| [85] Holmen et al., 2014           |                              |                            |                               |                             |                           |                               |                 |                  |               |                          |                       |                    |                     |            |                 |                           |                        |    |                  |   |   |                     |    |    |               |   |   |               |   |   |                      |   |   |
| [86] Ipijan & Johnston, 2017       |                              |                            |                               |                             |                           |                               |                 |                  |               |                          |                       |                    |                     |            |                 |                           |                        |    |                  |   |   |                     |    |    |               |   |   |               |   |   |                      |   |   |
| [87] Jensen et al., 2016           |                              |                            |                               |                             |                           |                               |                 |                  |               |                          |                       |                    |                     |            |                 |                           |                        |    |                  |   |   |                     |    |    |               |   |   |               |   |   |                      |   |   |
| [88] Johnston et al., 2013         |                              |                            |                               |                             |                           |                               |                 |                  |               |                          |                       |                    |                     |            |                 |                           |                        |    |                  |   |   |                     |    |    |               |   |   |               |   |   |                      |   |   |
| [89] Kim et al., 2017              |                              |                            |                               |                             |                           |                               |                 |                  |               |                          |                       |                    |                     |            |                 |                           |                        |    |                  |   |   |                     |    |    |               |   |   |               |   |   |                      |   |   |
| [90] Laing et al., 2014            |                              |                            |                               |                             |                           |                               |                 |                  |               |                          |                       |                    |                     |            |                 |                           |                        |    |                  |   |   |                     |    |    |               |   |   |               |   |   |                      |   |   |
| [91] Lee et al., 2010              |                              |                            |                               |                             |                           |                               |                 |                  |               |                          |                       |                    |                     |            |                 |                           |                        |    |                  |   |   |                     |    |    |               |   |   |               |   |   |                      |   |   |
| [92] Mc Carroll et al., 2015       |                              |                            |                               |                             |                           |                               |                 |                  |               |                          |                       |                    |                     |            |                 |                           |                        |    |                  |   |   |                     |    |    |               |   |   |               |   |   |                      |   |   |
| [93] Mummah et al., 2016           |                              |                            |                               |                             |                           |                               |                 |                  |               |                          |                       |                    |                     |            |                 |                           |                        |    |                  |   |   |                     |    |    |               |   |   |               |   |   |                      |   |   |
| [95] Partridge et al., 2015        |                              |                            |                               |                             |                           |                               |                 |                  |               |                          |                       |                    |                     |            |                 |                           |                        |    |                  |   |   |                     |    |    |               |   |   |               |   |   |                      |   |   |
| [94] Partridge et al., 2017        |                              |                            |                               |                             |                           |                               |                 |                  |               |                          |                       |                    |                     |            |                 |                           |                        |    |                  |   |   |                     |    |    |               |   |   |               |   |   |                      |   |   |
| [96] Rabbi et al., 2015            |                              |                            |                               |                             |                           |                               |                 |                  |               |                          |                       |                    |                     |            |                 |                           |                        |    |                  |   |   |                     |    |    |               |   |   |               |   |   |                      |   |   |
| [97] Recio-Rodríguez et al., 2016  |                              |                            |                               |                             |                           |                               |                 |                  |               |                          |                       |                    |                     |            |                 |                           |                        |    |                  |   |   |                     |    |    |               |   |   |               |   |   |                      |   |   |
| [98] Ross & Wing, 2016             |                              |                            |                               |                             |                           |                               |                 |                  |               |                          |                       |                    |                     |            |                 |                           |                        |    |                  |   |   |                     |    |    |               |   |   |               |   |   |                      |   |   |
| [99] Spring et al., 2017           |                              |                            |                               |                             |                           |                               |                 |                  |               |                          |                       |                    |                     |            |                 |                           |                        |    |                  |   |   |                     |    |    |               |   |   |               |   |   |                      |   |   |
| [100] Steinert et al., 2016        |                              |                            |                               |                             |                           |                               |                 |                  |               |                          |                       |                    |                     |            |                 |                           |                        |    |                  |   |   |                     |    |    |               |   |   |               |   |   |                      |   |   |
| [101] Stephens et al., 2017        |                              |                            |                               |                             |                           |                               |                 |                  |               |                          |                       |                    |                     |            |                 |                           |                        |    |                  |   |   |                     |    |    |               |   |   |               |   |   |                      |   |   |
| [102] Svetkey et al., 2015         |                              |                            |                               |                             |                           |                               |                 |                  |               |                          |                       |                    |                     |            |                 |                           |                        |    |                  |   |   |                     |    |    |               |   |   |               |   |   |                      |   |   |
| [103] Thomas & Wing, 2013          |                              |                            |                               |                             |                           |                               |                 |                  |               |                          |                       |                    |                     |            |                 |                           |                        |    |                  |   |   |                     |    |    |               |   |   |               |   |   |                      |   |   |
| [104] Torbjønson et al., 2014      |                              |                            |                               |                             |                           |                               |                 |                  |               |                          |                       |                    |                     |            |                 |                           |                        |    |                  |   |   |                     |    |    |               |   |   |               |   |   |                      |   |   |
| [105] Turner-McGrievy & Tate, 2011 |                              |                            |                               |                             |                           |                               |                 |                  |               |                          |                       |                    |                     |            |                 |                           |                        |    |                  |   |   |                     |    |    |               |   |   |               |   |   |                      |   |   |
| [106] Wharton et al., 2014         |                              |                            |                               |                             |                           |                               |                 |                  |               |                          |                       |                    |                     |            |                 |                           |                        |    |                  |   |   |                     |    |    |               |   |   |               |   |   |                      |   |   |
| [107] Widmer et al., 2015          |                              |                            |                               |                             |                           |                               |                 |                  |               |                          |                       |                    |                     |            |                 |                           |                        |    |                  |   |   |                     |    |    |               |   |   |               |   |   |                      |   |   |
| [108] Willey & Walsh, 2016         |                              |                            |                               |                             |                           |                               |                 |                  |               |                          |                       |                    |                     |            |                 |                           |                        |    |                  |   |   |                     |    |    |               |   |   |               |   |   |                      |   |   |
| Absolute frequency of BCTs         | 31                           | 28                         | 6                             | 14                          | 2                         | 20                            | 8               | 41               | 37            | 41                       | 17                    | 2                  | 11                  | 28         | 12              | 10                        | 12                     | 25 | 25               | 6 | 4 | 3                   | 17 | 17 | 9             | 2 | 1 | 7             | 1 | 1 | 1                    | 1 | 1 |

Note. Blue coloured squares represent the presence of the respective BCT cluster; green coloured squares the presence of a single BCT.

## Supporting Information 8

### Detailed description of included studies and analysed outcomes

*Legend.* <sup>1</sup> \* = groups were pooled and combined; <sup>x</sup> = groups were excluded from analysis; <sup>+</sup> = groups were analysed separately, <sup>2</sup> \$app available for download. For outcomes in **bold** separate analyses are reported. Outcomes in *Italic* are pooled in the analyses of nutrition behaviours and nutrition-related health outcomes.

| Review                                                 |                      |                                                                                                                                                                               |                                                   |                           |                                                                                                          |                                                                                                                                                         |                             |                                      |                                                                 | Meta-analysis                                                                                                                                                                                                             |                                   |           |
|--------------------------------------------------------|----------------------|-------------------------------------------------------------------------------------------------------------------------------------------------------------------------------|---------------------------------------------------|---------------------------|----------------------------------------------------------------------------------------------------------|---------------------------------------------------------------------------------------------------------------------------------------------------------|-----------------------------|--------------------------------------|-----------------------------------------------------------------|---------------------------------------------------------------------------------------------------------------------------------------------------------------------------------------------------------------------------|-----------------------------------|-----------|
| Study description (as reported in the primary article) |                      |                                                                                                                                                                               |                                                   |                           |                                                                                                          |                                                                                                                                                         |                             |                                      |                                                                 | Outcomes included in the analyses                                                                                                                                                                                         |                                   |           |
| Author                                                 | Design               | Study groups <sup>1</sup>                                                                                                                                                     | App <sup>2</sup>                                  | Sample size               | Participants                                                                                             | Aim of the study                                                                                                                                        | Intervention                | Duration                             | Outcomes as reported in the primary study                       | Nutrition behaviours                                                                                                                                                                                                      | Nutrition-related health outcomes | #Outcomes |
| Ahn et al., 2016 [69]                                  | Control group design | 2 groups:<br>(1) Web-based u-Health-program<br>(2) Control group                                                                                                              | Diabetes Mellitus Dietary Management Guide, DMDMG | 26                        | Diabetes patients<br>(1) $M_{age} = 50.5$<br>( $SD = 17.1$ );<br>(2) $M_{age} = 49.7$<br>( $SD = 16.4$ ) | Development of a mobile nutritional management program for integration into the web-based program for diabetic patients.                                | App only                    | 2 months<br>(1 month intervention)   | Anthropometric measures, nutrients, effectiveness of program    | <b>Caloric intake (kcal)</b><br><i>Dietary pattern (study specific score), carbohydrates, lipids, protein, vitamin A, vitamin B, vitamin C, vitamin B1, vitamin B2, vitamin B6, niacin, pholic acid, CA, P, FE, NA, K</i> | <b>Body weight BMI</b>            | 20        |
| Allen et al., 2013 [70]                                | RCT                  | 4 groups:<br>(1) Intensive counselling plus smartphone*<br>(2) Intensive counselling plus smartphone *<br>(3) Less intensive counselling plus smartphone *<br>(4) Smartphone* | LoseIt! <sup>§</sup>                              | 68<br>(43 after drop-out) | Obese participants<br>$M_{age} = 44.9$<br>( $SD = 11.1$ );<br>$M_{BMI} = 34.3$<br>( $SD = 3.9$ )         | Evaluation of feasibility, acceptability, and preliminary efficacy of theoretically-based behavioural interventions delivered by smartphone technology. | App + nutrition counselling | 6 months<br>(study and intervention) | Weight, BMI, waist circumference<br><br>Diet, physical activity | <b>Caloric intake (kcal)</b><br><b>Fruit/vegetable intake</b><br><br><i>Sodium</i>                                                                                                                                        | <b>Body weight BMI</b>            | 5         |

| Review                                                 |                      |                                                      |                       |                               |                                                                                                                             |                                                                                                                                                                                                   |                                                                  |                                                                                             |                                                                                                          | Meta-analysis                     |                                                                                                                                         |           |
|--------------------------------------------------------|----------------------|------------------------------------------------------|-----------------------|-------------------------------|-----------------------------------------------------------------------------------------------------------------------------|---------------------------------------------------------------------------------------------------------------------------------------------------------------------------------------------------|------------------------------------------------------------------|---------------------------------------------------------------------------------------------|----------------------------------------------------------------------------------------------------------|-----------------------------------|-----------------------------------------------------------------------------------------------------------------------------------------|-----------|
| Study description (as reported in the primary article) |                      |                                                      |                       |                               |                                                                                                                             |                                                                                                                                                                                                   |                                                                  |                                                                                             |                                                                                                          | Outcomes included in the analyses |                                                                                                                                         |           |
| Author                                                 | Design               | Study groups <sup>1</sup>                            | App <sup>2</sup>      | Sample size                   | Participants                                                                                                                | Aim of the study                                                                                                                                                                                  | Intervention                                                     | Duration                                                                                    | Outcomes as reported in the primary study                                                                | Nutrition behaviours              | Nutrition-related health outcomes                                                                                                       | #Outcomes |
| Appel et al., 2014 [71]                                | Control group design | 2 groups:<br>(1) App group<br>(2) Control group      | LoseIt! <sup>§</sup>  | 421<br>(118 after pre-survey) | Ethnically diverse and low-income participants<br>$M_{age} = 15.9$<br>( $SD = 1.3$ );<br>$M_{BMI} = 23.9$<br>( $SD = 4.9$ ) | Test an intervention for childhood obesity using a free smartphone app with the primary aim of assessing students' knowledge of nutritional indicators, physical exercise and use of screen time. | App only                                                         | 20 days<br>(study and intervention)                                                         | Physical activity, screen time, type of food, height, weight, nutrition knowledge                        |                                   | <b>BMI</b>                                                                                                                              | 1         |
| Balk-Møller et al., 2017 [72]                          | RCT                  | 2 groups:<br>(1) SoSu group<br>(2) Control group     | SoSu-life             | 566<br>(269 after drop-out)   | Nursing home employees;<br>(1) $M_{age} = 47$<br>( $SD = 10.0$ );<br>(2) $M_{age} = 47$<br>( $SD = 9.9$ )                   | Test a web- and mobile app-based tool ('SoSu-life') on employees in the social welfare and health care sector in Denmark.                                                                         | App only                                                         | 38 weeks<br>(study and intervention)                                                        | Weight<br><br>Body fat, waist circumference, blood pressure, cholesterol, well-being                     |                                   | <b>Body weight</b><br><b>Cholesterol</b><br><br><i>Body fat, waist circumference, systolic blood pressure, diastolic blood pressure</i> | 6         |
| Block et al., 2015 [61]                                | RCT                  | 2 groups:<br>(1) Alive-PD<br>(2) Waitlist as control | Alive-PD <sup>§</sup> | 339<br>(292 after drop-out)   | Prediabetic adults<br>$M_{age} = 55$<br>( $SD = 8.9$ )                                                                      | Evaluate the effectiveness of a fully automated algorithm-driven behavioural intervention for diabetes prevention.                                                                                | App + weekly e-mails, individual web page, automated phone calls | 12 months<br>(study and intervention but with less intensive intervention in last 6 months) | Glucose<br><br>Weight, BMI, waist circumference, triglyceride/ HDL ratio, Framingham diabetes risk score |                                   | <b>Body weight</b><br><b>BMI</b><br><br><i>Waist circumference, fasting glucose, HbA1c, triglyceride/ HDL ratio</i>                     | 6         |

| Review                                                 |        |                                                                                            |                                             |                                      |                                                                                                                                                                   |                                                                                                                                                                                                                                 |                   |                                         |                                                                                                                | Meta-analysis                                 |                                                                                                                                                           |           |
|--------------------------------------------------------|--------|--------------------------------------------------------------------------------------------|---------------------------------------------|--------------------------------------|-------------------------------------------------------------------------------------------------------------------------------------------------------------------|---------------------------------------------------------------------------------------------------------------------------------------------------------------------------------------------------------------------------------|-------------------|-----------------------------------------|----------------------------------------------------------------------------------------------------------------|-----------------------------------------------|-----------------------------------------------------------------------------------------------------------------------------------------------------------|-----------|
| Study description (as reported in the primary article) |        |                                                                                            |                                             |                                      |                                                                                                                                                                   |                                                                                                                                                                                                                                 |                   |                                         |                                                                                                                | Outcomes included in the analyses             |                                                                                                                                                           |           |
| Author                                                 | Design | Study groups <sup>1</sup>                                                                  | App <sup>2</sup>                            | Sample size                          | Parti-<br>pants                                                                                                                                                   | Aim of the<br>study                                                                                                                                                                                                             | Inter-<br>vention | Duration                                | Outcomes<br>as reported<br>in the<br>primary<br>study                                                          | Nutrition<br>behaviours                       | Nutrition-<br>related<br>health<br>outcomes                                                                                                               | #Outcomes |
| Brindal et al., 2013 [73]                              | RCT    | 2 groups:<br>(1) MRP<br>support app<br>(2) Static app<br>based on<br>information<br>in MRP | Meal<br>Replace-<br>ment<br>Program,<br>MRP | 58<br>(44<br>after<br>drop-<br>out)  | Adult<br>women with<br>BMI > 25<br>$M_{age} = 42$<br>(range: 19-<br>63);<br>$M_{weight} =$<br>92.4 kg<br>( $SD = 14.7$ );<br>$M_{BMI} = 34$<br>(range: 26-<br>43) | Development and<br>evaluation of a<br>weight-loss<br>intervention<br>delivered by an<br>evidence-based<br>smartphone app that<br>supported individuals<br>embarking on a diet.                                                  | App only          | 2 months<br>(study and<br>intervention) | User interaction<br><br>App evaluation,<br>mood, motivation,<br>weight, dietary<br>compliance                  | <i>Dietary pattern (Meal<br/>replacement)</i> | <b>Body weight</b>                                                                                                                                        | 2         |
| Brindal et al., 2016 [74]                              | RCT    | 2 groups:<br>(1) MRP<br>support app<br>(2) Static app<br>based on<br>information<br>in MRP | Meal<br>Replace-<br>ment<br>Program,<br>MRP | 146<br>(84<br>after<br>drop-<br>out) | Overweight<br>and obese<br>adults<br>$M_{age} = 48.18$<br>( $SD = 11.75$ )                                                                                        | Design and evaluate<br>a weight-loss<br>program, including a<br>partial MRP, point-<br>of-care testing and<br>face-to-face and<br>smartphone app<br>support, appropriate<br>for delivery in a<br>community<br>pharmacy setting. | App + MRP         | 6 months<br>(3 months<br>intervention)  | Weight, blood<br>pressure, glucose<br>and blood lipids<br><br>Self-efficacy,<br>physical activity,<br>feedback |                                               | <b>Body weight</b><br><b>Cholesterol</b><br><br><i>Systolic blood<br/>pressure, diastolic<br/>blood pressure,<br/>glucose, triglyceride,<br/>HDL, LDL</i> | 8         |

| Review                                                 |        |                                                                                                                  |                                    |                            |                                                                                                                                                                                                                                            |                                                                                                                                   |                                         |                                      |                                                                                                                       | Meta-analysis                     |                                                         |           |
|--------------------------------------------------------|--------|------------------------------------------------------------------------------------------------------------------|------------------------------------|----------------------------|--------------------------------------------------------------------------------------------------------------------------------------------------------------------------------------------------------------------------------------------|-----------------------------------------------------------------------------------------------------------------------------------|-----------------------------------------|--------------------------------------|-----------------------------------------------------------------------------------------------------------------------|-----------------------------------|---------------------------------------------------------|-----------|
| Study description (as reported in the primary article) |        |                                                                                                                  |                                    |                            |                                                                                                                                                                                                                                            |                                                                                                                                   |                                         |                                      |                                                                                                                       | Outcomes included in the analyses |                                                         |           |
| Author                                                 | Design | Study groups <sup>1</sup>                                                                                        | App <sup>2</sup>                   | Sample size                | Participants                                                                                                                                                                                                                               | Aim of the study                                                                                                                  | Intervention                            | Duration                             | Outcomes as reported in the primary study                                                                             | Nutrition behaviours              | Nutrition-related health outcomes                       | #Outcomes |
| Burke et al., 2017 [75]                                | RCT    | 3 groups:<br>(1) LoseIt smartphone app*<br>(2) App+ feedback*<br>(3) App + feedback + in-persons group sessions* | LoseIt! <sup>§</sup>               | 39<br>(29 after drop-out)  | Obese or overweight adults<br>$M_{age} = 44.84$<br>( $SD = 12.75$ );<br>$M_{BMI} = 33.76$<br>( $SD = 4.28$ )                                                                                                                               | Test the feasibility of providing 1-4 daily messages tailored to dietary recordings via smartphone.                               | App + feedback messages, group sessions | 3 months<br>(study and intervention) | Recruitment, retention, adherence, weight<br><br>Blood pressure, self-efficacy                                        |                                   | <b>Body weight</b>                                      | 1         |
| Carter et al., 2013 [76]                               | RCT    | 3 groups:<br>(1) Mobile<br>(2) Website*<br>(3) Diary group*                                                      | My Meal Mate<br>(MMM) <sup>§</sup> | 128<br>(79 after drop-out) | Overweight adults<br>(1) $M_{age} = 41.2$ ( $SD = 8.5$ ); $M_{BMI} = 33.7$ ( $SD = 4.2$ )<br>(2) $M_{age} = 41.9$ ( $SD = 10.6$ ); $M_{BMI} = 34.5$ ( $SD = 5.6$ )<br>(3) $M_{age} = 42.5$ ( $SD = 8.3$ ); $M_{BMI} = 34.5$ ( $SD = 5.7$ ) | Collect acceptability and feasibility outcomes of a self-monitoring weight management intervention delivered by a smartphone app. | App only                                | 6 months<br>(study and intervention) | Feasibility and acceptability<br><br>Height, weight, BMI, body fat, demographics, physical activity, eating behaviour |                                   | <b>Body weight</b><br><b>BMI</b><br><br><i>Body fat</i> | 3         |

| Review                                                 |                 |                                              |                                          |                             |                                                                                                              |                                                                                                                                                                     |                                  |                                       |                                                                                                                                                               | Meta-analysis                                                                                          |                                                                                                                                                                            |           |
|--------------------------------------------------------|-----------------|----------------------------------------------|------------------------------------------|-----------------------------|--------------------------------------------------------------------------------------------------------------|---------------------------------------------------------------------------------------------------------------------------------------------------------------------|----------------------------------|---------------------------------------|---------------------------------------------------------------------------------------------------------------------------------------------------------------|--------------------------------------------------------------------------------------------------------|----------------------------------------------------------------------------------------------------------------------------------------------------------------------------|-----------|
| Study description (as reported in the primary article) |                 |                                              |                                          |                             |                                                                                                              |                                                                                                                                                                     |                                  |                                       |                                                                                                                                                               | Outcomes included in the analyses                                                                      |                                                                                                                                                                            |           |
| Author                                                 | Design          | Study groups <sup>1</sup>                    | App <sup>2</sup>                         | Sample size                 | Participants                                                                                                 | Aim of the study                                                                                                                                                    | Intervention                     | Duration                              | Outcomes as reported in the primary study                                                                                                                     | Nutrition behaviours                                                                                   | Nutrition-related health outcomes                                                                                                                                          | #Outcomes |
| Duncan et al., 2014 [77]                               | RCT             | 2 groups:<br>(1) Print-based<br>(2) IT-based | ManUp                                    | 301<br>(148 after drop-out) | Adult males<br>(1) $M_{age} = 43.8$<br>( $SD = 0.6$ )<br>(2) $M_{age} = 44.2$<br>( $SD = 0.4$ )              | Examine the effectiveness of an IT-based intervention to improve physical activity, dietary behaviors, and health literacy compared to a print-based intervention.  | App only                         | 9 months<br>(study and intervention)  | Physical activity, dietary behaviour, health literacy, satisfaction, IT platform usage                                                                        | <i>Dietary pattern (study specific score)</i><br><br><i>High-fibre bread, low-fat milk consumption</i> |                                                                                                                                                                            | 3         |
| Frøisland et al., 2012 [78]                            | Pre-post design | 1 group testing two apps                     | Diambo, unnamed app                      | 12<br>(11 after drop-out)   | Adolescents, Diabetes Type 1<br>$M_{age} = 16.2$<br>( $SD = 1.7$ );<br>$M_{BMI} = 23.3$<br>( $SD = 3.2$ )    | Explore how mobile phone applications can be used in follow-up of adolescents with type 1 diabetes, and use the findings to development these applications further. | App + counselling and reflection | 3 months<br>(study and intervention)  | HbA1C, glycaemic control, usability, knowledge tests                                                                                                          |                                                                                                        | HbA1c                                                                                                                                                                      | 1         |
| Fukuoka et al., 2015 [79]                              | RCT             | 2 groups:<br>(1) Intervention<br>(2) Control | Mobile Diabetes Prevention Program, mDPP | 61<br>(56 after drop-out)   | Adults with risk of Type 2 Diabetes<br>$M_{age} = 55.3$<br>( $SE = 9$ );<br>$M_{BMI} = 33.3$<br>( $SE = 6$ ) | Examine the feasibility and efficacy of a diabetes prevention intervention combined with a mobile app and pedometer.                                                | App + in-person sessions         | 5.5 months<br>(5 months intervention) | Weight, BMI<br><br>Hip circumference, blood pressure, lipids, glucose, physical activity, caloric, SSB, fat intake, social support, self-efficacy, depression | <b>Caloric intake (kcal)</b><br><br><i>Fat, saturated fat, SSB consumption</i>                         | <b>Body weight</b><br><b>BMI</b><br><b>Cholesterol</b><br><br><i>Hip circumference, systolic blood pressure, diastolic blood pressure, glucose, triglyceride, HDL, LDL</i> | 14        |

| Review                                                 |                 |                                                          |                                                 |                          |                                                                                                                             |                                                                                                                                                                         |                                                                                                        |                                  |                                                                                                                                                   | Meta-analysis                                                                     |                                                                                                                                                      |           |
|--------------------------------------------------------|-----------------|----------------------------------------------------------|-------------------------------------------------|--------------------------|-----------------------------------------------------------------------------------------------------------------------------|-------------------------------------------------------------------------------------------------------------------------------------------------------------------------|--------------------------------------------------------------------------------------------------------|----------------------------------|---------------------------------------------------------------------------------------------------------------------------------------------------|-----------------------------------------------------------------------------------|------------------------------------------------------------------------------------------------------------------------------------------------------|-----------|
| Study description (as reported in the primary article) |                 |                                                          |                                                 |                          |                                                                                                                             |                                                                                                                                                                         |                                                                                                        |                                  |                                                                                                                                                   | Outcomes included in the analyses                                                 |                                                                                                                                                      |           |
| Author                                                 | Design          | Study groups <sup>1</sup>                                | App <sup>2</sup>                                | Sample size              | Participants                                                                                                                | Aim of the study                                                                                                                                                        | Intervention                                                                                           | Duration                         | Outcomes as reported in the primary study                                                                                                         | Nutrition behaviours                                                              | Nutrition-related health outcomes                                                                                                                    | #Outcomes |
| Gilson et al., 2017 [80]                               | Pre-post design | 1 group                                                  | Jawbone Up <sup>s</sup>                         | 26 (19 after drop-out)   | Male Australian truck drivers<br>$M_{age} = 44.4$ ( $SD = 10$ );<br>$M_{BMI} = 31.2$ ( $SD = 4.6$ )                         | Examine the extent to which an m-Health financial incentive program facilitated physical activity and healthy dietary choices.                                          | App + feedback, guidance and monetary reward                                                           | 7 months (5 months intervention) | Physical activity<br><br>Sedentary time, fruit/vegetable intake, fat, sugar                                                                       | <b>Fruit intake</b><br><b>Vegetable intake</b><br><br><i>Saturated fat, sugar</i> |                                                                                                                                                      | 4         |
| Godino et al., 2016 [81]                               | RCT             | 2 groups:<br>(1) SMART intervention<br>(2) Control group | GoalGetter App, BeHealthy App, Trend Setter App | 404 (355 after drop-out) | Young adults<br>$M_{age} = 22.7$ ( $SD = 3.8$ )<br>(1) $M_{BMI} = 28.9$ ( $SD = 2.8$ )<br>(2) $M_{BMI} = 29$ ( $SD = 2.7$ ) | Assess the efficacy of a 2-year theory-based weight-loss intervention delivered via integrated user experiences.                                                        | App + Facebook, text messaging, emails, website, technology-mediated communication with a health coach | 24 months                        | Weight<br><br>BMI, waist/ arm circumference, blood pressure, heart rate, use of intervention components                                           |                                                                                   | <b>Body weight</b><br><b>BMI</b><br><br><i>Waist circumference, arm circumference, systolic blood pressure, diastolic blood pressure, heart rate</i> | 7         |
| Gordon et al., 2017 [82]                               | Pre-post design | 1 group                                                  | See Me Smoke-Free <sup>TM</sup>                 | 73 (66 after drop-out)   | Smoking women<br>$M_{age} = 39.1$ ( $SD = 13.1$ )                                                                           | Develop and test the feasibility and potential of the See Me Smoke-Free <sup>TM</sup> m-Health app to address smoking, diet, and physical activity among women smokers. | App only                                                                                               | 3 months (30 days intervention)  | Physical activity, fruit, vegetable, juice intake, smoking, tobacco use, weight, body image, craving, withdrawal, app satisfaction, acceptability | <b>Fruit intake</b><br><b>Vegetable intake</b><br><br><i>Juice consumption</i>    | <b>Body weight</b>                                                                                                                                   | 4         |



| Review                                                 |        |                                                                               |                  |                           |                                                                                                                            |                                                                                                                                                                                                                                               |                                                              |                                      |                                                                                                                   | Meta-analysis                                                                |                                   |           |
|--------------------------------------------------------|--------|-------------------------------------------------------------------------------|------------------|---------------------------|----------------------------------------------------------------------------------------------------------------------------|-----------------------------------------------------------------------------------------------------------------------------------------------------------------------------------------------------------------------------------------------|--------------------------------------------------------------|--------------------------------------|-------------------------------------------------------------------------------------------------------------------|------------------------------------------------------------------------------|-----------------------------------|-----------|
| Study description (as reported in the primary article) |        |                                                                               |                  |                           |                                                                                                                            |                                                                                                                                                                                                                                               |                                                              |                                      |                                                                                                                   | Outcomes included in the analyses                                            |                                   |           |
| Author                                                 | Design | Study groups <sup>1</sup>                                                     | App <sup>2</sup> | Sample size               | Participants                                                                                                               | Aim of the study                                                                                                                                                                                                                              | Intervention                                                 | Duration                             | Outcomes as reported in the primary study                                                                         | Nutrition behaviours                                                         | Nutrition-related health outcomes | #Outcomes |
| Hales et al., 2016 [83]                                | RCT    | 2 groups:<br>(1) Social POD app <sup>+</sup><br>(2) Standard app <sup>+</sup> | Social POD App   | 51<br>(42 after drop-out) | Overweight adults<br>$M_{age} = 46.2$<br>( $SD = 12.4$ )<br>$M_{BMI} = 34.7$<br>( $SD = 6.0$ )                             | Test the efficacy of a weight loss mobile app based on recommender systems to target social support and self-monitoring of diet, physical activity, and weight, compared to a commercially-available diet and physical activity tracking app. | App + podcasts                                               | 3 months<br>(study and intervention) | Weight<br><br>BMI, caloric intake, expenditure, social support, self-efficacy, outcome expectations               | <b>Caloric intake (kcal)</b>                                                 | <b>Body weight BMI</b>            | 3         |
| Hebden et al., 2014 [84]                               | RCT    | 2 groups:<br>(1) Intervention<br>(2) Control                                  | m-Health program | 51<br>(46 after drop-out) | (1) $M_{age} = 22.6$<br>( $SD = 5.4$ );<br>$M_{BMI} = 27.3$<br>(2) $M_{age} = 23.1$<br>( $SD = 3.7$ );<br>$M_{BMI} = 27.2$ | Measure the effect of a m-Health intervention program on body weight, BMI and specific lifestyle behaviours.                                                                                                                                  | App + SMS, e-mails, internet forum, guidance of investigator | 13 weeks<br>(12 weeks intervention)  | Weight, BMI<br><br>Sitting time, physical activity, SSB intake, energy-dense takeaway meals, fruit and vegetables | <b>Fruit intake</b><br><b>Vegetable intake</b><br><br><i>SSB consumption</i> | <b>Body weight BMI</b>            | 5         |

| Review                                                 |        |                                                                                       |                            |                          |                                                                                                                                   |                                                                                                                                                                                                                       |              |                                  |                                                                                                               | Meta-analysis                                                                                                  |                                        |           |
|--------------------------------------------------------|--------|---------------------------------------------------------------------------------------|----------------------------|--------------------------|-----------------------------------------------------------------------------------------------------------------------------------|-----------------------------------------------------------------------------------------------------------------------------------------------------------------------------------------------------------------------|--------------|----------------------------------|---------------------------------------------------------------------------------------------------------------|----------------------------------------------------------------------------------------------------------------|----------------------------------------|-----------|
| Study description (as reported in the primary article) |        |                                                                                       |                            |                          |                                                                                                                                   |                                                                                                                                                                                                                       |              |                                  |                                                                                                               | Outcomes included in the analyses                                                                              |                                        |           |
| Author                                                 | Design | Study groups <sup>1</sup>                                                             | App <sup>2</sup>           | Sample size              | Participants                                                                                                                      | Aim of the study                                                                                                                                                                                                      | Intervention | Duration                         | Outcomes as reported in the primary study                                                                     | Nutrition behaviours                                                                                           | Nutrition-related health outcomes      | #Outcomes |
| Holmen et al., 2014 [85]                               | RCT    | 3 groups:<br>(1) FTA<br>(2) FTA +health counselling <sup>x</sup><br>(3) Control group | Few Touch Application, FTA | 151 (120 after drop-out) | Overweight adults<br>age range: 18 - 35;<br>BMI range: 24 - 32                                                                    | Test whether the use of a mobile phone-based self-management system, with or without telephone health counselling, could improve glycated haemoglobin A1c level, self-management, and health-related quality of life. | App only     | 1 year (study and intervention)  | HbA1c level<br><br>Self-management, lifestyle, dietary habits, physical activity, depressive symptoms, weight |                                                                                                                | <b>Body weight</b><br><br><i>HbA1c</i> | 2         |
| Ipjian & Johnston, 2017 [85]                           | RCT    | 2 groups:<br>(1) MyFitnessPal App<br>(2) Writing journal                              | MyFitness Pal <sup>s</sup> | 30                       | Adults<br>$M_{age} = 34.4$<br>( $SD = 15.7$ )<br>(1) $M_{BMI} = 25.3$<br>( $SD = 4.9$ )<br>(2) $M_{BMI} = 25.9$<br>( $SD = 3.7$ ) | Reducing sodium intake to determine whether a commercial health app is useful for promoting dietary change.                                                                                                           | App only     | 1 month (study and intervention) | Sodium intake, dietary quality score, blood pressure, weight, body fat, waist circumference                   | <i>Dietary pattern (Rapid Eating and Activity Assessment for Participants - short version, REAP-S), sodium</i> |                                        | 2         |

| Review                                                 |                 |                                                                                                         |                                  |                          |                                                                                                                 |                                                                                                                                                                                                  |                                                           |                                                      |                                                                                      | Meta-analysis                     |                                   |           |
|--------------------------------------------------------|-----------------|---------------------------------------------------------------------------------------------------------|----------------------------------|--------------------------|-----------------------------------------------------------------------------------------------------------------|--------------------------------------------------------------------------------------------------------------------------------------------------------------------------------------------------|-----------------------------------------------------------|------------------------------------------------------|--------------------------------------------------------------------------------------|-----------------------------------|-----------------------------------|-----------|
| Study description (as reported in the primary article) |                 |                                                                                                         |                                  |                          |                                                                                                                 |                                                                                                                                                                                                  |                                                           |                                                      |                                                                                      | Outcomes included in the analyses |                                   |           |
| Author                                                 | Design          | Study groups <sup>1</sup>                                                                               | App <sup>2</sup>                 | Sample size              | Participants                                                                                                    | Aim of the study                                                                                                                                                                                 | Intervention                                              | Duration                                             | Outcomes as reported in the primary study                                            | Nutrition behaviours              | Nutrition-related health outcomes | #Outcomes |
| Jensen et al., 2016 [87]                               | Pre-post design | 1 group in two different phases (3 months combined treatment followed by 3 months electronic treatment) | Daily Burn Tracker <sup>s</sup>  | 16 (10 after drop-out)   | Overweight or obese adolescents<br>$M_{age} = 14.3$<br>( $SD = 1.1$ )                                           | Examine the efficacy and acceptability of a smartphone assisted adolescent behavioural weight control intervention.                                                                              | App + group and family weight loss program, text messages | 1 year (2 intervention periods of 3 months each)     | BMI, weight, satisfaction with intervention<br><br>Feasibility of intervention       |                                   | <b>Body weight BMI</b>            | 2         |
| Johnston et al., 2013 [88]                             | RCT             | 2 groups:<br>(1) Weight Watchers<br>(2) Self-help control group                                         | Weight Watchers App <sup>s</sup> | 292 (257 after drop-out) | Obese or overweight adults<br>$M_{age} = 46.5$<br>( $SD = 10.5$ );<br>$M_{BMI} = 33$<br>( $SD = 3.6$ )          | Examine weight loss between a community-based, intensive behavioural counselling program and a self-help condition.                                                                              | App + weekly meetings, online tools                       | 6 months (study and intervention)                    | Weight, BMI<br><br>Attendance, mobile device application usage, use of access points |                                   | <b>Body weight BMI</b>            | 2         |
| Kim et al., 2017 [89]                                  | Online survey   | 1 group                                                                                                 | Noom <sup>s</sup>                | 384                      | Adults and adolescents using Noom<br>$M_{age} = 34.4$<br>( $SD = 10.6$ );<br>$M_{BMI} = 30.6$<br>( $SD = 6.5$ ) | Examine the use of a weight loss app to elucidate how it can help individuals harness the power of self-efficacy and group support to enact behaviour change and accomplishment of health goals. | App only                                                  | One-time assessment but extracted data from 6 months | Self-efficacy, behavioural variables, weight, BMI                                    |                                   | <b>Body weight BMI</b>            | 2         |

| Review                                                 |                     |                                                                              |                               |                                       |                                                                                                                                                                 |                                                                                                                                                                       |                   |                                         |                                                                                                          | Meta-analysis                                         |                                                              |           |
|--------------------------------------------------------|---------------------|------------------------------------------------------------------------------|-------------------------------|---------------------------------------|-----------------------------------------------------------------------------------------------------------------------------------------------------------------|-----------------------------------------------------------------------------------------------------------------------------------------------------------------------|-------------------|-----------------------------------------|----------------------------------------------------------------------------------------------------------|-------------------------------------------------------|--------------------------------------------------------------|-----------|
| Study description (as reported in the primary article) |                     |                                                                              |                               |                                       |                                                                                                                                                                 |                                                                                                                                                                       |                   |                                         |                                                                                                          | Outcomes included in the analyses                     |                                                              |           |
| Author                                                 | Design              | Study groups <sup>1</sup>                                                    | App <sup>2</sup>              | Sample size                           | Parti-<br>pants                                                                                                                                                 | Aim of the<br>study                                                                                                                                                   | Inter-<br>vention | Duration                                | Outcomes<br>as reported<br>in the<br>primary<br>study                                                    | Nutrition<br>behaviours                               | Nutrition-<br>related<br>health<br>outcomes                  | #Outcomes |
| Laing et al., 2014 [90]                                | RCT                 | 2 groups:<br>(1) Usual<br>primary care<br>+ app<br>(2) Usual<br>primary care | MyFitness<br>Pal <sup>§</sup> | 212<br>(158<br>after<br>drop-<br>out) | Overweight<br>or obese<br>adults<br>$M_{age} = 43.1$<br>( $SD = 14$ )<br>(1) $M_{BMI} =$<br>33.3<br>( $SD = 6.8$ )<br>(2) $M_{BMI} =$<br>33.3<br>( $SD = 7.2$ ) | Evaluate the impact<br>of introducing<br>patients to a popular,<br>free smartphone app<br>for weight loss in a<br>primary care setting                                | App only          | 6 months<br>(study and<br>intervention) | Weight<br><br>Blood pressure,<br>physical activity,<br>healthy diet,<br>calorie goals, self-<br>efficacy | <i>Dietary pattern (two study<br/>specific score)</i> | <b>Body weight</b><br><br><i>Systolic blood<br/>pressure</i> | 4         |
| Lee et al., 2010 [91]                                  | Case-control design | 2 groups:<br>(1) Intervention<br>group<br>(2) Informed<br>control group      | The<br>SmartDiet              | 36                                    | Volunteers<br>from an<br>obesity<br>clinic;<br>(1) $M_{age} =$<br>28.2;<br>$M_{BMI} = 22.2$<br>(2) $M_{age} =$<br>29.5;<br>$M_{BMI} = 22.3$                     | Evaluate the<br>effectiveness of the<br>mobile phone<br>application with<br>respect to acquiring<br>dietary information,<br>weight control, and<br>user satisfaction. | App only          | 6 weeks<br>(study and<br>intervention)  | Body composition,<br>physical activity,<br>regularity of<br>eating, smoking,<br>drinking                 |                                                       | <b>Body weight</b><br><b>BMI</b><br><br><i>Body fat mass</i> | 3         |

| Review                                                 |                 |                                                                  |                      |                        |                                                                                                                 |                                                                                                                                                |                                                                                    |                                              |                                                                                                   | Meta-analysis                                                                                                                                               |                                                                    |           |
|--------------------------------------------------------|-----------------|------------------------------------------------------------------|----------------------|------------------------|-----------------------------------------------------------------------------------------------------------------|------------------------------------------------------------------------------------------------------------------------------------------------|------------------------------------------------------------------------------------|----------------------------------------------|---------------------------------------------------------------------------------------------------|-------------------------------------------------------------------------------------------------------------------------------------------------------------|--------------------------------------------------------------------|-----------|
| Study description (as reported in the primary article) |                 |                                                                  |                      |                        |                                                                                                                 |                                                                                                                                                |                                                                                    |                                              |                                                                                                   | Outcomes included in the analyses                                                                                                                           |                                                                    |           |
| Author                                                 | Design          | Study groups <sup>1</sup>                                        | App <sup>2</sup>     | Sample size            | Participants                                                                                                    | Aim of the study                                                                                                                               | Intervention                                                                       | Duration                                     | Outcomes as reported in the primary study                                                         | Nutrition behaviours                                                                                                                                        | Nutrition-related health outcomes                                  | #Outcomes |
| Mc Carroll et al., 2015 [92]                           | Pre-post design | 1 group                                                          | LoseIt! <sup>5</sup> | 50 (35 after drop-out) | Endometrial and breast cancer survivors<br>$M_{age} = 58.4$ ( $SD = 10.3$ );<br>$M_{BMI} = 36.4$ ( $SD = 8.1$ ) | Assess a one-month lifestyle intervention delivered via a web- and mobile-based weight-loss application using a healthcare-provider interface. | App + nutrition and weight goal set at baseline, phone calls, e-mail notifications | 1 month (study and intervention)             | Weight, BMI, waist circumference<br><br>Physical activity, caloric intake and nutritional content | <b>Caloric intake (kcal)</b><br><br><i>Carbohydrates, fat, protein, fibre</i>                                                                               | <b>Body weight</b><br><b>BMI</b><br><br><i>Waist circumference</i> | 8         |
| Mummah et al., 2016 [93]                               | RCT             | 2 groups:<br>(1) Intervention<br>(2) Wait-list control condition | Vegethon             | 17 (12 after drop-out) | Overweight adults<br>$M_{age} = 42$ ( $SD = 7.3$ );<br>$M_{BMI} = 32$ ( $SD = 3.5$ )                            | Assess the initial efficacy and user acceptability of a theory-driven mobile app to increase vegetable consumption.                            | App only                                                                           | 3 months (intervention app at least 6 weeks) | Vegetable consumption                                                                             | <b>Vegetable intake</b> (all vegetables, green leafy vegetables, cruciferous vegetables, dark yellow vegetables, tomatoes, other vegetables, beans/lentils) |                                                                    | 7         |

| Review                                                 |        |                                                          |                  |                                         |                                                                                                                                                                |                                                                                                                                                                                                                                                        |                                                                      |                                      |                                                                                                                                     | Meta-analysis                                                                                |                                   |           |
|--------------------------------------------------------|--------|----------------------------------------------------------|------------------|-----------------------------------------|----------------------------------------------------------------------------------------------------------------------------------------------------------------|--------------------------------------------------------------------------------------------------------------------------------------------------------------------------------------------------------------------------------------------------------|----------------------------------------------------------------------|--------------------------------------|-------------------------------------------------------------------------------------------------------------------------------------|----------------------------------------------------------------------------------------------|-----------------------------------|-----------|
| Study description (as reported in the primary article) |        |                                                          |                  |                                         |                                                                                                                                                                |                                                                                                                                                                                                                                                        |                                                                      |                                      |                                                                                                                                     | Outcomes included in the analyses                                                            |                                   |           |
| Author                                                 | Design | Study groups <sup>1</sup>                                | App <sup>2</sup> | Sample size                             | Participants                                                                                                                                                   | Aim of the study                                                                                                                                                                                                                                       | Intervention                                                         | Duration                             | Outcomes as reported in the primary study                                                                                           | Nutrition behaviours                                                                         | Nutrition-related health outcomes | #Outcomes |
| Partridge et al., 2015 [95]                            | RCT    | 2 groups:<br>(1) Intervention group<br>(2) Control group | TXT2BFit         | 248<br>(214 after drop-out at 12 weeks) | (1) $M_{age} = 28.1$<br>( $SD = 4.9$ );<br>$M_{BMI} = 27.3$<br>( $SD = 2.4$ )<br>(2) $M_{age} = 27.2$<br>( $SD = 4.9$ );<br>$M_{BMI} = 27.1$<br>( $SD = 2.7$ ) | Design and assess the efficacy of a m-Health prevention program in preventing excess weight gain and improving dietary and physical activity behaviours in young adults at increased risk of obesity and unhealthy lifestyle choices.                  | App + coaching calls, text messages, e-mails                         | 3 months<br>(study and intervention) | Weight, BMI<br><br>Physical activity, fruit and vegetable intake, SSB, energy-dense takeout meals                                   |                                                                                              | <b>Body weight</b><br><b>BMI</b>  | 2         |
| Partridge et al., 2017 [94]                            | RCT    | 2 groups:<br>(1) Intervention group<br>(2) Control group | TXT2BFit         | 248<br>(202 after drop-out at 9 month)  | Young adults at risk of weight gain<br>age range: 18 - 35;<br>BMI range: 21 - 32                                                                               | Assess the intervention effects on knowledge, self-efficacy and stage-of-change for four target lifestyle behaviours, and investigate the mediating effects of self-efficacy on those lifestyle behaviours in the weight gain prevention intervention. | App + coaching calls, text messages, e-mails, study website, booklet | 9 months<br>(3 months intervention)  | Fruit and vegetable knowledge, self-efficacy, diet (stage of change for fruit, vegetables, SSB, take-away meals), physical activity | <b>Fruit intake</b><br><b>Vegetable intake</b><br><br><i>SSB, take-away meal consumption</i> |                                   | 4         |

| Review                                                 |        |                                                                                        |                  |                             |                                                                                                                                                                |                                                                                                                                                                                                                    |                                                                                     |                                      |                                                                                                                    | Meta-analysis                                                                                          |                                   |           |
|--------------------------------------------------------|--------|----------------------------------------------------------------------------------------|------------------|-----------------------------|----------------------------------------------------------------------------------------------------------------------------------------------------------------|--------------------------------------------------------------------------------------------------------------------------------------------------------------------------------------------------------------------|-------------------------------------------------------------------------------------|--------------------------------------|--------------------------------------------------------------------------------------------------------------------|--------------------------------------------------------------------------------------------------------|-----------------------------------|-----------|
| Study description (as reported in the primary article) |        |                                                                                        |                  |                             |                                                                                                                                                                |                                                                                                                                                                                                                    |                                                                                     |                                      |                                                                                                                    | Outcomes included in the analyses                                                                      |                                   |           |
| Author                                                 | Design | Study groups <sup>1</sup>                                                              | App <sup>2</sup> | Sample size                 | Participants                                                                                                                                                   | Aim of the study                                                                                                                                                                                                   | Intervention                                                                        | Duration                             | Outcomes as reported in the primary study                                                                          | Nutrition behaviours                                                                                   | Nutrition-related health outcomes | #Outcomes |
| Rabbi et al., 2015 [96]                                | RCT    | 2 groups:<br>(1) Intervention group with personalized suggestions<br>(2) Control group | My Behaviour     | 18<br>(17 after drop-out)   | Adults<br>$M_{age} = 28.3$<br>( $SD = 7.0$ )                                                                                                                   | Technical feasibility on implementing an automated feedback system, the impact of the suggestions on user physical activity and eating behaviour, and user perceptions of the automatically generated suggestions. | App only                                                                            | 3 weeks<br>(2 weeks intervention)    | Dietary behaviour, physical activity                                                                               | <b>Caloric intake (kcal)</b>                                                                           |                                   | 1         |
| Recio-Rodriguez et al., 2016 [97]                      | RCT    | 2 groups:<br>(1) App + counselling group<br>(2) Counselling only group                 | unclear          | 833<br>(765 after drop-out) | (1) $M_{age} = 51.4$<br>( $SD = 12.1$ );<br>$M_{BMI} = 28.1$<br>( $SD = 5.1$ )<br>(2) $M_{age} = 52.3$<br>( $SD = 12$ );<br>$M_{BMI} = 27.6$<br>( $SD = 4.6$ ) | Evaluate the effect of adding an app to standard counselling on increased physical activity and adherence to the Mediterranean diet, 3 months after implementation.                                                | App + counselling in physical activity and Mediterranean diet, one in-between visit | 12 months<br>(3 months intervention) | Physical activity, Mediterranean diet score<br><br>Blood pressure, waist circumference, BMI, laboratory parameters | <i>Dietary pattern (Mediterranean diet according to MEDAS - Mediterranean Diet Adherence Screener)</i> |                                   | 1         |

| Review                                                 |        |                                                                                                                                   |                                     |                           |                                                                                                           |                                                                                                                                                   |                                                                                            |                                   |                                            | Meta-analysis                     |                                   |           |
|--------------------------------------------------------|--------|-----------------------------------------------------------------------------------------------------------------------------------|-------------------------------------|---------------------------|-----------------------------------------------------------------------------------------------------------|---------------------------------------------------------------------------------------------------------------------------------------------------|--------------------------------------------------------------------------------------------|-----------------------------------|--------------------------------------------|-----------------------------------|-----------------------------------|-----------|
| Study description (as reported in the primary article) |        |                                                                                                                                   |                                     |                           |                                                                                                           |                                                                                                                                                   |                                                                                            |                                   |                                            | Outcomes included in the analyses |                                   |           |
| Author                                                 | Design | Study groups <sup>1</sup>                                                                                                         | App <sup>2</sup>                    | Sample size               | Participants                                                                                              | Aim of the study                                                                                                                                  | Intervention                                                                               | Duration                          | Outcomes as reported in the primary study  | Nutrition behaviours              | Nutrition-related health outcomes | #Outcomes |
| Ross & Wing, 2016 [98]                                 | RCT    | 3 groups:<br>(1) Standard tool<br>(2) Technology-based tool*<br>(3) Technology-based tool combined with phone-based intervention* | FitBit Smart-phone App <sup>5</sup> | 80<br>(72 after drop-out) | Overweight and obese adults<br>$M_{age} = 51.1$<br>( $SD = 11.7$ );<br>$M_{BMI} = 33.0$<br>( $SD = 3.4$ ) | Examine efficacy of self-monitoring technology, with and without phone-based intervention, on 6-month weight loss in overweight and obese adults. | App + in person “weight loss 101” session                                                  | 6 months (study and intervention) | Weight<br><br>Adherence to self-monitoring |                                   | <b>Body weight</b>                | 1         |
| Spring et al., 2017 [99]                               | RCT    | 3 groups:<br>(1) Self-guided <sup>x</sup><br>(2) Standard<br>(3) Technology supported                                             | ENGAG-ED                            | 96<br>(83 after drop-out) | Overweight or obese adults<br>$M_{age} = 39.3$<br>( $SD = 11.7$ );<br>$M_{BMI} = 34.6$<br>( $SD = 3$ )    | Determine the effects on weight loss of three abbreviated behavioural weight loss interventions with and without coaching and mobile technology.  | App + weight loss target, kcal goal, team competition, financial incentive, group sessions | 12 months (6 months intervention) | Weight<br><br>Behavioural adherence        |                                   | <b>Body weight</b>                | 1         |



| Review                                                 |                 |                                                                                                                 |                        |                        |                                                                                                                                             |                                                                                                                                                                                                                                         |                                                                                             |                                   |                                                                                         | Meta-analysis                                                                                                                                                                                         |                                                                    |           |
|--------------------------------------------------------|-----------------|-----------------------------------------------------------------------------------------------------------------|------------------------|------------------------|---------------------------------------------------------------------------------------------------------------------------------------------|-----------------------------------------------------------------------------------------------------------------------------------------------------------------------------------------------------------------------------------------|---------------------------------------------------------------------------------------------|-----------------------------------|-----------------------------------------------------------------------------------------|-------------------------------------------------------------------------------------------------------------------------------------------------------------------------------------------------------|--------------------------------------------------------------------|-----------|
| Study description (as reported in the primary article) |                 |                                                                                                                 |                        |                        |                                                                                                                                             |                                                                                                                                                                                                                                         |                                                                                             |                                   |                                                                                         | Outcomes included in the analyses                                                                                                                                                                     |                                                                    |           |
| Author                                                 | Design          | Study groups <sup>1</sup>                                                                                       | App <sup>2</sup>       | Sample size            | Participants                                                                                                                                | Aim of the study                                                                                                                                                                                                                        | Intervention                                                                                | Duration                          | Outcomes as reported in the primary study                                               | Nutrition behaviours                                                                                                                                                                                  | Nutrition-related health outcomes                                  | #Outcomes |
| Steinert et al., 2016 [100]                            | Pre-post design | 1 group                                                                                                         | MyTherapy <sup>s</sup> | 30                     | $M_{age} = 68$ (range: 61-76);<br>15 females with<br>$M_{BMI} = 27.7$ (range: 24-35);<br>15 males with<br>$M_{BMI} = 27.3$ (range: 22.5-34) | Identify the benefit of self-monitoring with a smartphone application for adults.                                                                                                                                                       | App only                                                                                    | 5 weeks (4 weeks intervention)    | Recreational and physical activity, weight, water control, nutrition, medication intake | <b>Fruit intake</b><br><br><i>Fish consumption</i>                                                                                                                                                    | <b>Body weight</b>                                                 | 3         |
| Stephens et al., 2017 [101]                            | RCT             | 2 groups:<br>(1) Intervention group with app + health coach + counselling<br>(2) Only counselling control group | LoseIt! <sup>s</sup>   | 62 (59 after drop-out) | Young adults<br>age range: 18 - 25;<br>$M_{BMI} = 28.5$                                                                                     | Effectiveness of a behaviour-based smartphone application for weight loss, combined with text messaging from a health coach on weight, body mass index, and waist circumference in young adults in comparison with a control condition. | App + baseline counselling sessions, specific goal setting, text messages from health coach | 3 months (study and intervention) | Weight, BMI, waist circumference<br><br>Diet, physical activity, self-efficacy          | <b>Fruit intake</b><br><b>Vegetable intake</b><br><b>Caloric intake (kcal)</b><br><br><i>Carbohydrates, protein, fat, saturated fat, sugar, added sugar, fibre, sodium, dairy product consumption</i> | <b>Body weight</b><br><b>BMI</b><br><br><i>Waist circumference</i> | 15        |

| Review                                                 |                 |                                                                                                                        |                                          |                             |                                                                                                               |                                                                                                                                                                                             |                                                                                 |                                                                                    |                                                                                | Meta-analysis                                           |                                   |           |
|--------------------------------------------------------|-----------------|------------------------------------------------------------------------------------------------------------------------|------------------------------------------|-----------------------------|---------------------------------------------------------------------------------------------------------------|---------------------------------------------------------------------------------------------------------------------------------------------------------------------------------------------|---------------------------------------------------------------------------------|------------------------------------------------------------------------------------|--------------------------------------------------------------------------------|---------------------------------------------------------|-----------------------------------|-----------|
| Study description (as reported in the primary article) |                 |                                                                                                                        |                                          |                             |                                                                                                               |                                                                                                                                                                                             |                                                                                 |                                                                                    |                                                                                | Outcomes included in the analyses                       |                                   |           |
| Author                                                 | Design          | Study groups <sup>1</sup>                                                                                              | App <sup>2</sup>                         | Sample size                 | Participants                                                                                                  | Aim of the study                                                                                                                                                                            | Intervention                                                                    | Duration                                                                           | Outcomes as reported in the primary study                                      | Nutrition behaviours                                    | Nutrition-related health outcomes | #Outcomes |
| Svetkey et al., 2015 [102]                             | RCT             | 3 groups:<br>(1) App group<br>(2) Personal coaching enhanced by smartphone self-monitoring <sup>x</sup><br>(3) Control | unclear                                  | 365<br>(313 after drop-out) | Young overweight or obese adults<br>$M_{age} = 29.4$<br>( $SD = 4.3$ );<br>$M_{BMI} = 35.2$<br>( $SD = 7.8$ ) | Determine the effect on weight of two mobile technology-based behavioural weight loss interventions in young adults.                                                                        | App only                                                                        | 2 years<br>(study and intervention)                                                | Weight<br><br>Weight changes in sub-groups, Healthy Eating Index               | <i>Dietary pattern (Healthy Eating Index, HEI-2005)</i> | <b>Body weight</b>                | 2         |
| Thomas & Wing, 2013 [103]                              | Pre-post design | 1 group                                                                                                                | Health-E-Call and DailyBurn <sup>s</sup> | 20<br>(15 for 2nd period)   | Overweight or obese adults<br>$M_{age} = 53.0$<br>( $SD = 1.9$ );<br>$M_{BMI} = 36.3$<br>( $SE = 1.2$ )       | Evaluate smartphones as a method of delivering key components of established and empirically validated behavioural weight loss treatment, with an emphasis on adherence to self-monitoring. | App + individual goal setting sessions, SMS, in-person weigh-ins, paper lessons | 6 months<br>(at least 3 months intervention with additional treatment at 6 months) | Weight, adherence to self-monitoring protocol<br><br>Satisfaction with program |                                                         | <b>Body weight</b>                | 1         |

| Review                                                 |        |                                                                                                                           |                                                                                        |                          |                                                                                                 |                                                                                                                                                                                                                              |                                                          |                                                                                |                                                                                                     | Meta-analysis                                                                                     |                                   |           |
|--------------------------------------------------------|--------|---------------------------------------------------------------------------------------------------------------------------|----------------------------------------------------------------------------------------|--------------------------|-------------------------------------------------------------------------------------------------|------------------------------------------------------------------------------------------------------------------------------------------------------------------------------------------------------------------------------|----------------------------------------------------------|--------------------------------------------------------------------------------|-----------------------------------------------------------------------------------------------------|---------------------------------------------------------------------------------------------------|-----------------------------------|-----------|
| Study description (as reported in the primary article) |        |                                                                                                                           |                                                                                        |                          |                                                                                                 |                                                                                                                                                                                                                              |                                                          |                                                                                |                                                                                                     | Outcomes included in the analyses                                                                 |                                   |           |
| Author                                                 | Design | Study groups <sup>1</sup>                                                                                                 | App <sup>2</sup>                                                                       | Sample size              | Participants                                                                                    | Aim of the study                                                                                                                                                                                                             | Intervention                                             | Duration                                                                       | Outcomes as reported in the primary study                                                           | Nutrition behaviours                                                                              | Nutrition-related health outcomes | #Outcomes |
| Torbjønns. et al., 2014 [104]                          | RCT    | 3 groups:<br>(1) FTA intervention<br>(2) FTA+health counselling intervention <sup>x</sup><br>(3) Usual care control group | Few Touch Application, FTA                                                             | 151 (129 after drop-out) | Adults with type 2 diabetes<br>$M_{age} = 57$ ( $SD = 12$ );<br>$M_{BMI} = 31.7$ ( $SD = 6.0$ ) | Evaluate whether the introduction of technology-supported self-management using the FTA diabetes diary, with or without health counselling, improved HbA1c levels, self-management, behavioural change, and quality of life. | App only                                                 | 1 year (study and intervention, but only 4 months follow-up included in paper) | HbA1c<br><br>Self-management, behaviour change, health-related quality of life                      |                                                                                                   | <i>HbA1c</i>                      | 1         |
| Turner-M.&Tate, 2011 [105]                             | RCT    | 2 groups:<br>(1) Podcast mobile group<br>(2) Podcast                                                                      | FatSecret's Calorie Counter app (version 2010) <sup>s</sup> + Twitter app <sup>s</sup> | 96 (86 after drop-out)   | Overweight adults age range: 18-60;<br>$M_{BMI} = 32.6$ (range: 25-45)                          | Examine whether a combination of podcasting, mobile support communication, and mobile diet monitoring can assist people in weight loss.                                                                                      | App + Twitter, podcasts, messages from study coordinator | 6 months (study and intervention)                                              | Weight<br><br>Diet, physical activity, psychosocial measures, user control, elaboration, evaluation | <b>Caloric intake (kcal)</b><br><br><i>Dietary pattern (Eating Behaviour Inventory, EBI), fat</i> | <b>Body weight</b>                | 4         |

| Review                                                 |                      |                                                                                                                                                                                   |                                 |                           |                                                                                                                                                                                                                                           |                                                                                                                                                           |                                       |                                   |                                           | Meta-analysis                                 |                                                                                                                                                         |           |
|--------------------------------------------------------|----------------------|-----------------------------------------------------------------------------------------------------------------------------------------------------------------------------------|---------------------------------|---------------------------|-------------------------------------------------------------------------------------------------------------------------------------------------------------------------------------------------------------------------------------------|-----------------------------------------------------------------------------------------------------------------------------------------------------------|---------------------------------------|-----------------------------------|-------------------------------------------|-----------------------------------------------|---------------------------------------------------------------------------------------------------------------------------------------------------------|-----------|
| Study description (as reported in the primary article) |                      |                                                                                                                                                                                   |                                 |                           |                                                                                                                                                                                                                                           |                                                                                                                                                           |                                       |                                   |                                           | Outcomes included in the analyses             |                                                                                                                                                         |           |
| Author                                                 | Design               | Study groups <sup>1</sup>                                                                                                                                                         | App <sup>2</sup>                | Sample size               | Participants                                                                                                                                                                                                                              | Aim of the study                                                                                                                                          | Intervention                          | Duration                          | Outcomes as reported in the primary study | Nutrition behaviours                          | Nutrition-related health outcomes                                                                                                                       | #Outcomes |
| Wharton et al., 2014 [106]                             | Control group design | 3 groups:<br>(1) App<br>(2) Memo function*<br>(3) Paper pencil*                                                                                                                   | LoseIt! <sup>5</sup>            | 57<br>(47 after drop-out) | Adults aged 18-65<br>(1) $M_{age} = 43.7$ ( $SD = 3.5$ ); $M_{BMI} = 29.9$ ( $SD = 0.9$ )<br>(2) $M_{age} = 41.5$ ( $SD = 4.0$ ); $M_{BMI} = 31.0$ ( $SD = 1.7$ )<br>(3) $M_{age} = 40.8$ ( $SD = 3.8$ ); $M_{BMI} = 28.9$ ( $SD = 1.0$ ) | Test the use of a popular smartphone app for dietary self-monitoring and weight loss by comparing it with traditional diet counselling and entry methods. | App + nutrition counselling, messages | 8 weeks (study and intervention)  | Dietary intake, weight, BMI, attrition    |                                               | <b>Body weight</b>                                                                                                                                      | 1         |
| Widmer et al., 2015 [107]                              | Control group design | 4 groups:<br>(1) Entering CR<br>(2) Finishing CR <sup>x</sup><br>(3) Entering CR using personal health assistant<br>(4) Finishing CR using personal health assistant <sup>x</sup> | Personal Health Assistant (PHA) | 76<br>(72 after drop-out) | Clinic patients<br>(1)&(2) $M_{age} = 70.4$ ( $SD = 9.9$ ); $M_{BMI} = 30.6$ ( $SD = 5.6$ )<br>(3)&(4) $M_{age} = 60.2$ ( $SD = 12.1$ ); $M_{BMI} = 29.2$ ( $SD = 4.4$ )                                                                  | Test a digital health intervention as an adjunct to cardiac rehabilitation (CR).                                                                          | App + e-mail reminder                 | 3 months (study and intervention) | Blood pressure, weight, blood parameters  | <i>Dietary pattern (study specific score)</i> | <b>Body weight</b><br><b>BMI</b><br><b>Cholesterol</b><br><br><i>systolic blood pressure, diastolic blood pressure, triglyceride, HDL, LDL, glucose</i> | 10        |

| Review                                                 |                    |                           |                                         |             |                                                                                            |                                                                               |              |                                   |                                                                                                              | Meta-analysis                     |                                                                                                                                                                          |           |
|--------------------------------------------------------|--------------------|---------------------------|-----------------------------------------|-------------|--------------------------------------------------------------------------------------------|-------------------------------------------------------------------------------|--------------|-----------------------------------|--------------------------------------------------------------------------------------------------------------|-----------------------------------|--------------------------------------------------------------------------------------------------------------------------------------------------------------------------|-----------|
| Study description (as reported in the primary article) |                    |                           |                                         |             |                                                                                            |                                                                               |              |                                   |                                                                                                              | Outcomes included in the analyses |                                                                                                                                                                          |           |
| Author                                                 | Design             | Study groups <sup>1</sup> | App <sup>2</sup>                        | Sample size | Participants                                                                               | Aim of the study                                                              | Intervention | Duration                          | Outcomes as reported in the primary study                                                                    | Nutrition behaviours              | Nutrition-related health outcomes                                                                                                                                        | #Outcomes |
| Willey & Walsh, 2016 [108]                             | Quasi-experimental | 1 group                   | YouPlus Health mobile coaching platform | 10          | Caucasian women<br>$M_{age} = 43.5$ (range: 35-49);<br>$M_{BMI} = 31.6$ (range: 27.2-36.4) | Evaluation of participants using the YouPlus Health mobile coaching platform. | App only     | 3 months (study and intervention) | Weight, waist circumference, blood pressure, lipids, glyco-haemoglobin, maximum volume of oxygen consumption |                                   | <b>Body weight</b><br><b>Cholesterol</b><br><br><i>Waist circumference, systolic blood pressure, diastolic blood pressure, triglyceride, HDL, LDL, glyco-haemoglobin</i> | 9         |

## Supporting Information 9

Funnel plot for the all-encompassing data set with observed effect size Hedges'  $g$  on the horizontal axis plotted against the standard error

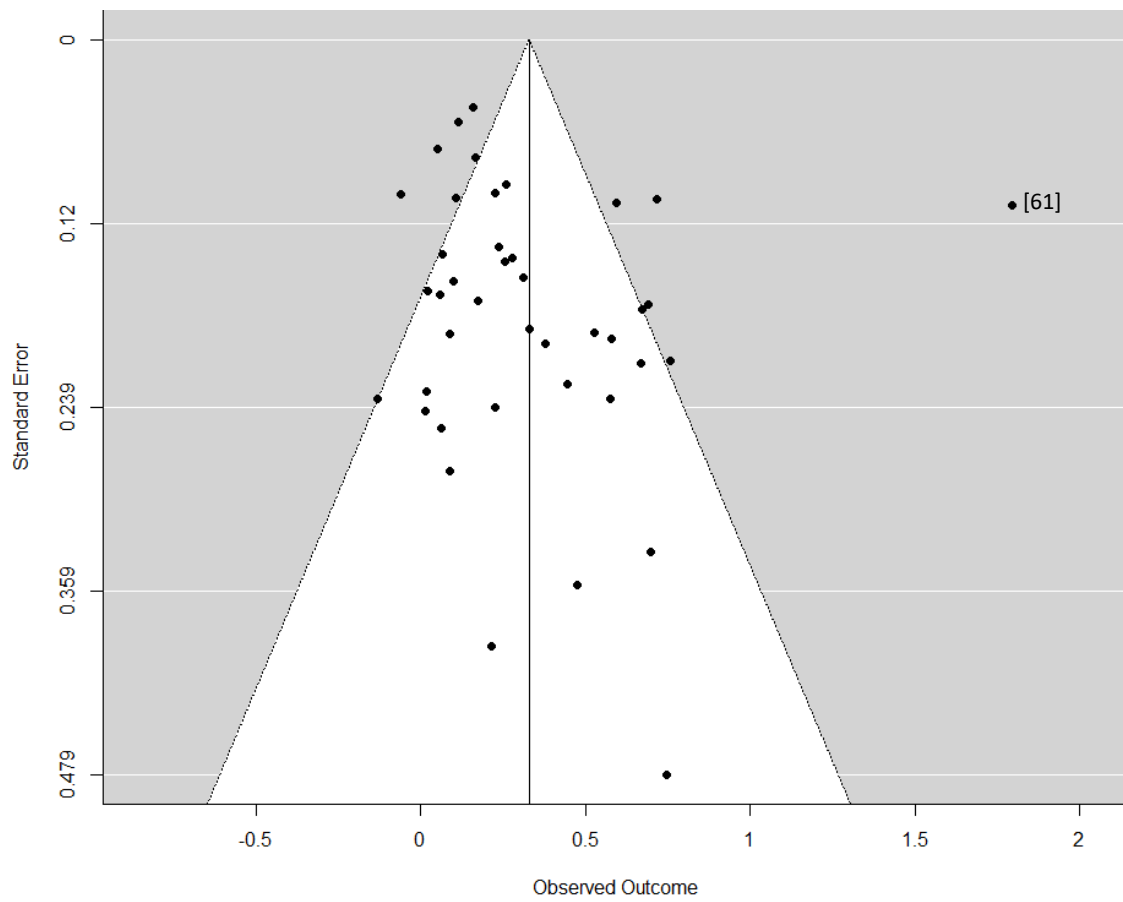

## Supporting Information 10

### Meta-regression and moderation effect results

| Moderator                                                     | Estimate | <i>SE</i> | <i>p</i> | <i>CI</i>    |
|---------------------------------------------------------------|----------|-----------|----------|--------------|
| Study design (RCT vs. no-RCT)                                 | 0.06     | 0.11      | 0.622    | -0.17 - 0.28 |
| Study quality                                                 | -0.18    | 0.12      | 0.120    | -0.41 - 0.05 |
| Sample size                                                   | -0.00    | 0.00      | 0.710    | -0.00 - 0.00 |
| Sample characteristic (clinical vs. non-clinical)             | 0.11     | 0.11      | 0.287    | -0.10 - 0.32 |
| Study sample (adolescents vs. adults)                         | 0.12     | 0.24      | 0.602    | -0.34 - 0.59 |
| Study duration                                                | -0.00    | 0.00      | 0.163    | -0.01 - 0.00 |
| Intervention duration                                         | -0.00    | 0.00      | 0.304    | -0.01 - 0.00 |
| Drop-out rate (%)                                             | -0.00    | 0.00      | 0.875    | -0.01 - 0.01 |
| Number of included outcomes                                   | -0.01    | 0.01      | 0.467    | -0.03 - 0.01 |
| Type of app (commercial vs. research)                         | -0.07    | 0.10      | 0.457    | -0.26 - 0.12 |
| Treatment component in addition to app<br>(app only vs. app+) | 0.06     | 0.11      | 0.606    | -0.16 - 0.27 |
| Number of BCTs                                                | -0.01    | 0.02      | 0.564    | -0.06 - 0.03 |

## Supporting Information 11

Effect sizes (Cohen's  $d$ ) for all analysis levels and outcomes

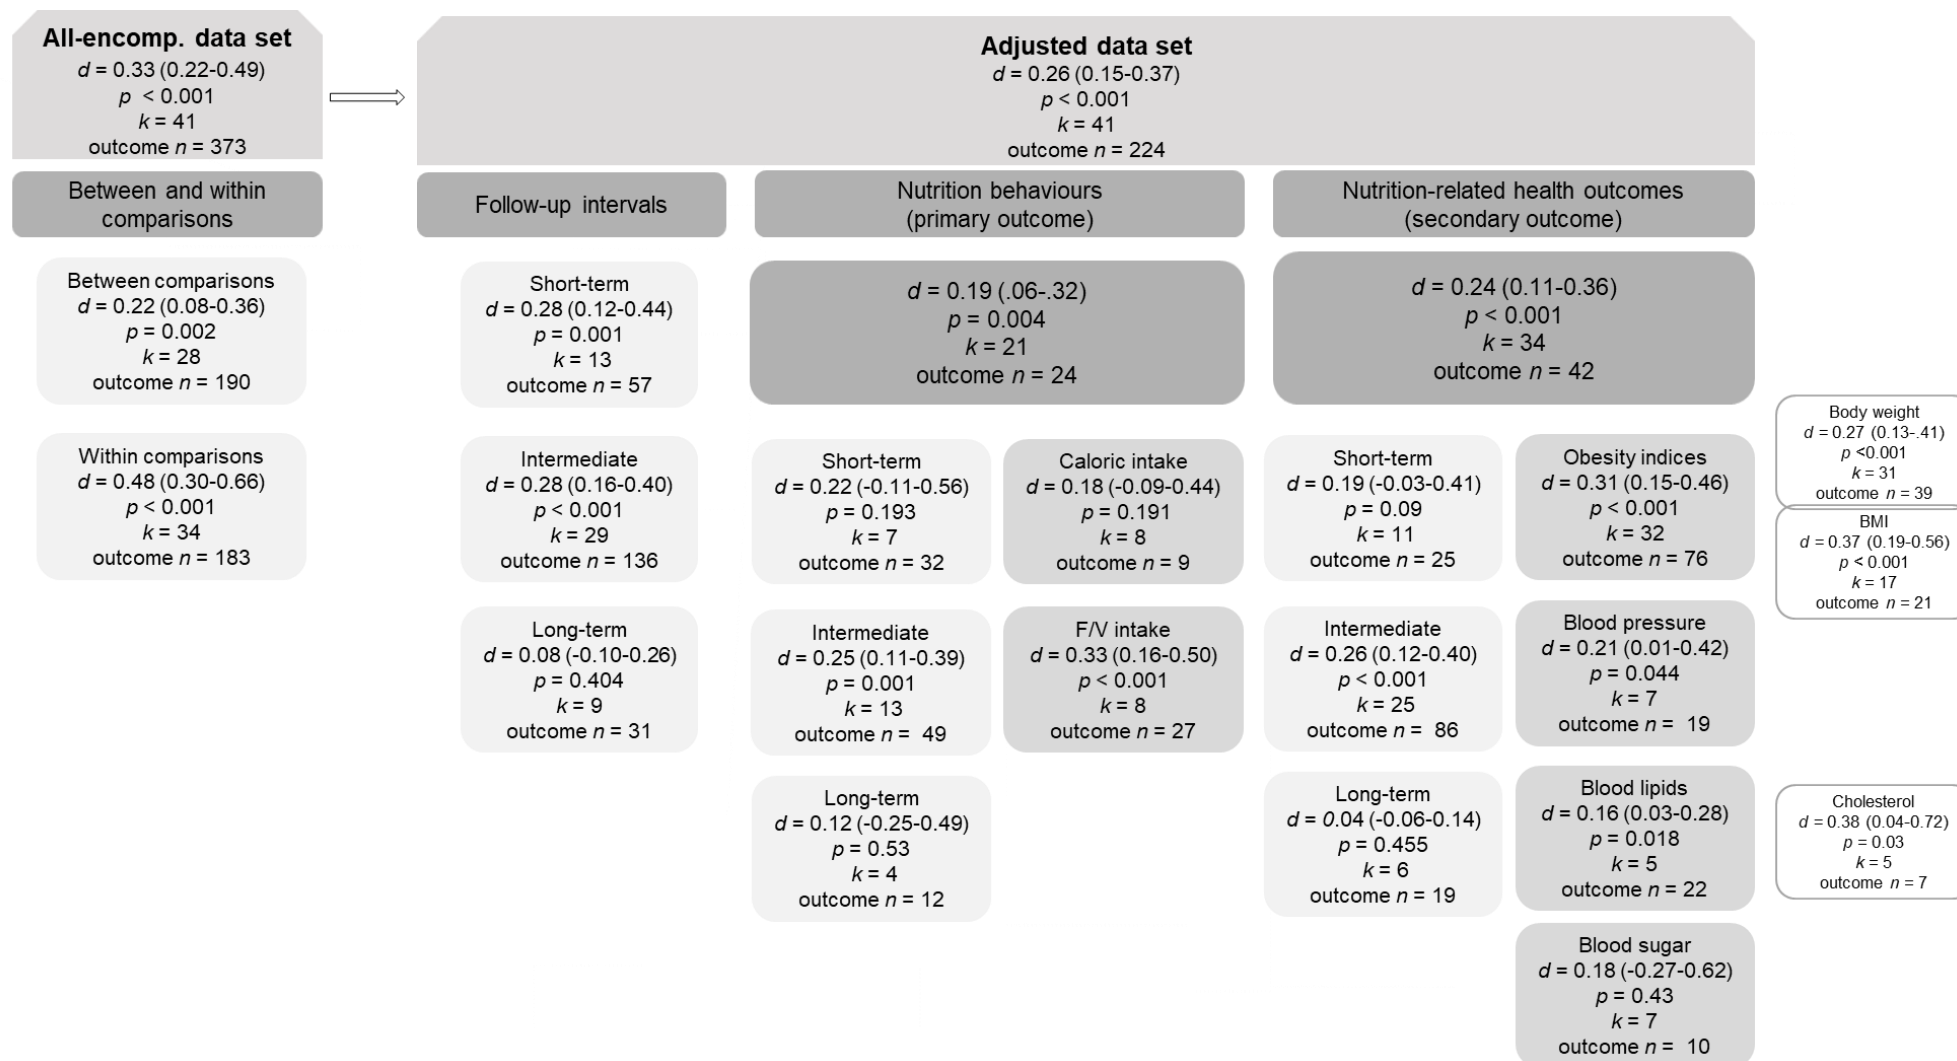



## Supporting Information 12

Effect sizes (Hedges'  $g$ ) for all analysis levels and outcomes

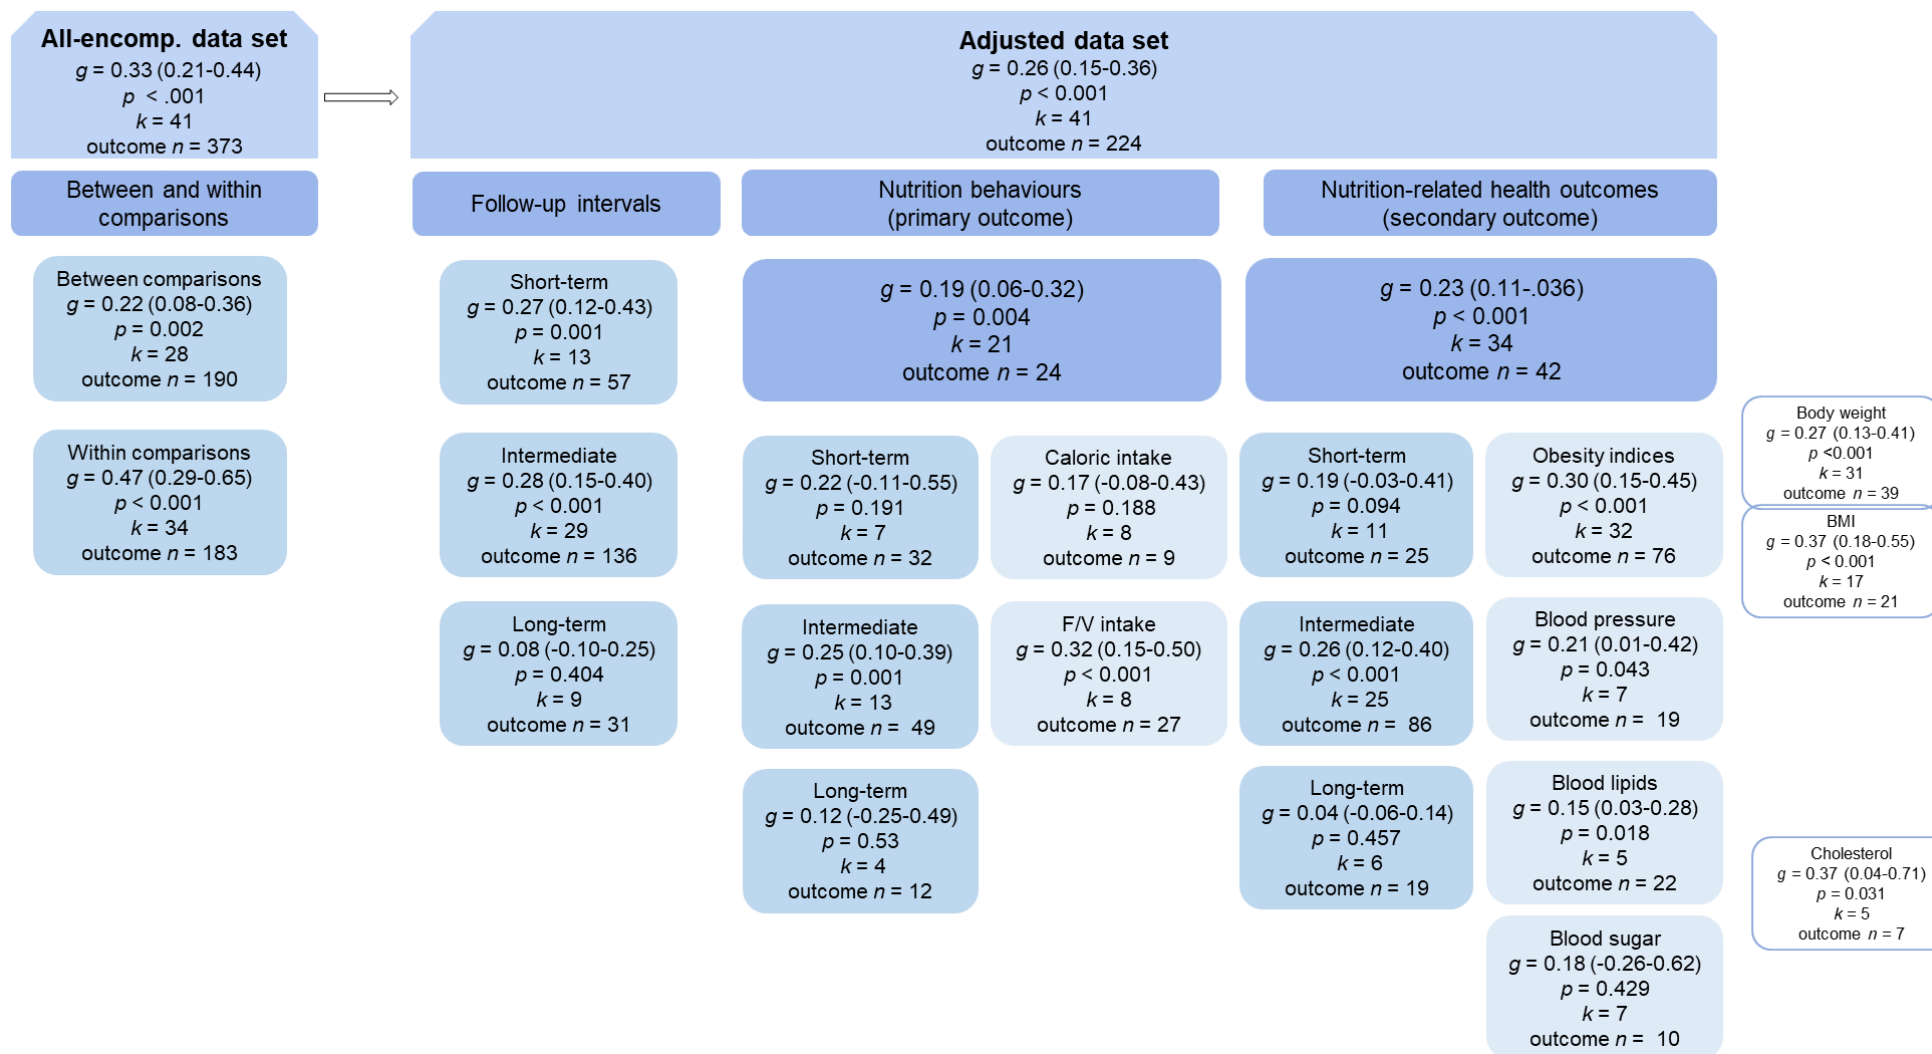

## Supporting Information 13

Forest plots for outcomes

### I. Nutrition behaviours

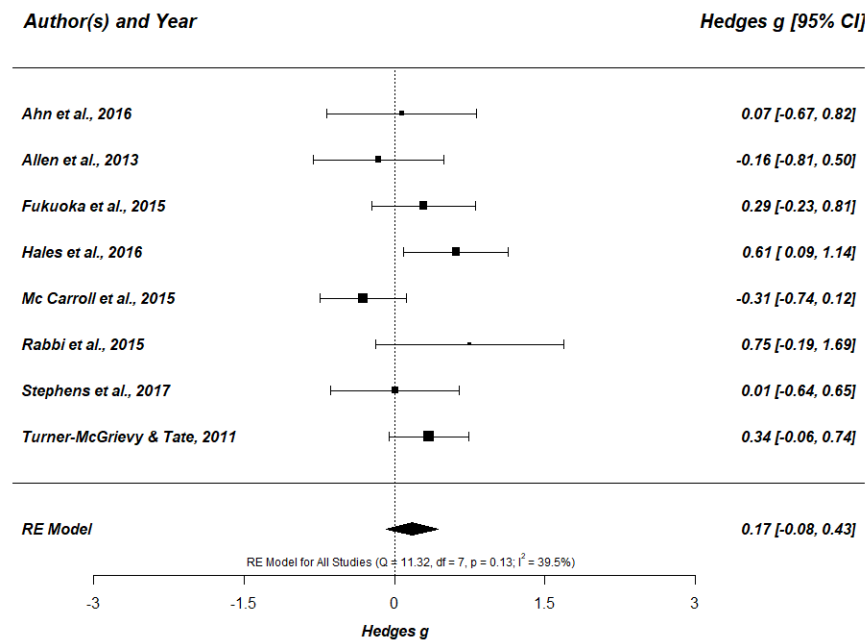

**Figure 13.1.** Forest plot showing the effects of app-based mobile interventions on caloric intake ( $k = 8$ , outcome  $n = 9$ ; adjusted data set).

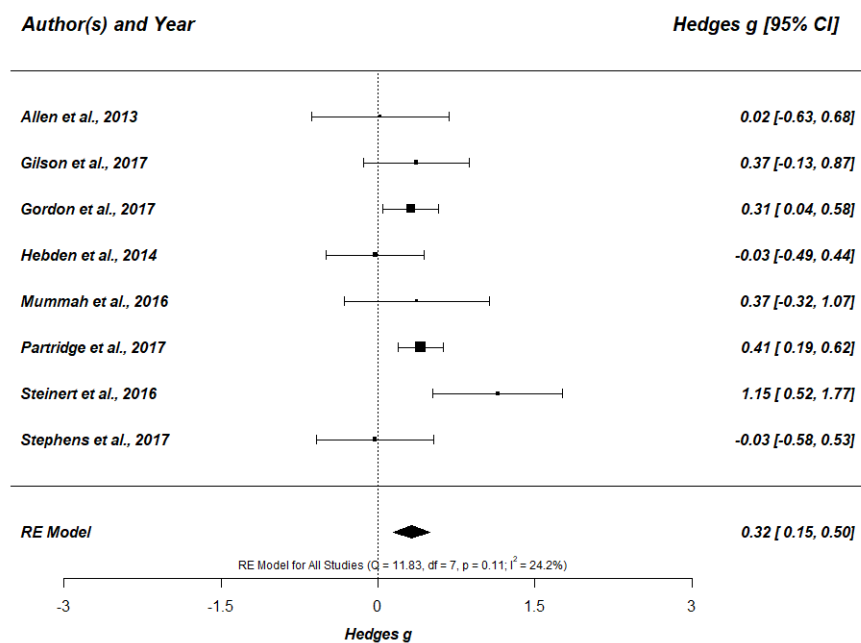

**Figure 13.2.** Forest plot showing the effects of app-based mobile interventions on fruit/vegetable intake ( $k = 8$ , outcome  $n = 27$ ; adjusted data set).

## II. Nutrition-related health outcomes

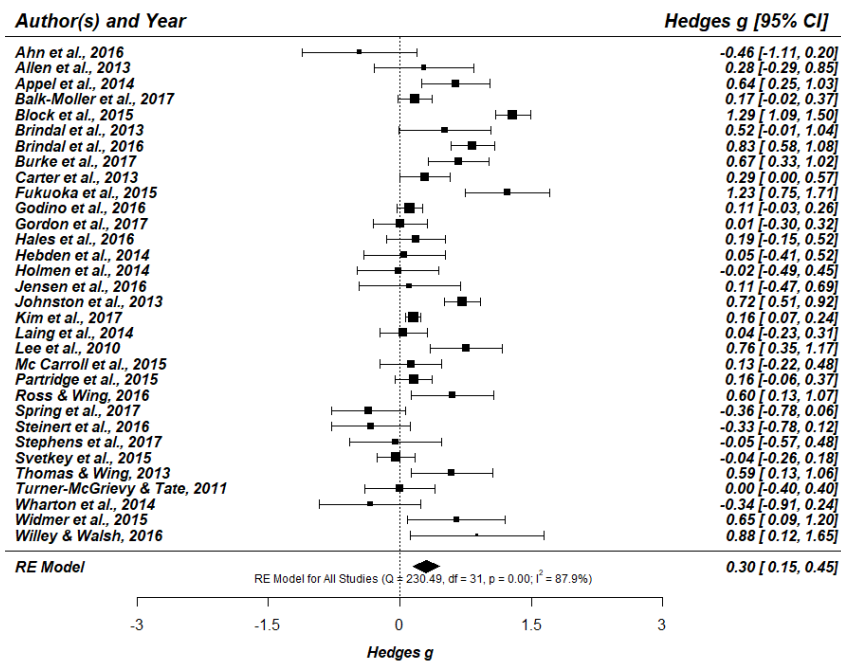

**Figure 13.3.** Forest plot showing the effects of app-based mobile interventions on obesity indices ( $k = 32$ , outcome  $n = 76$ ; adjusted data set).

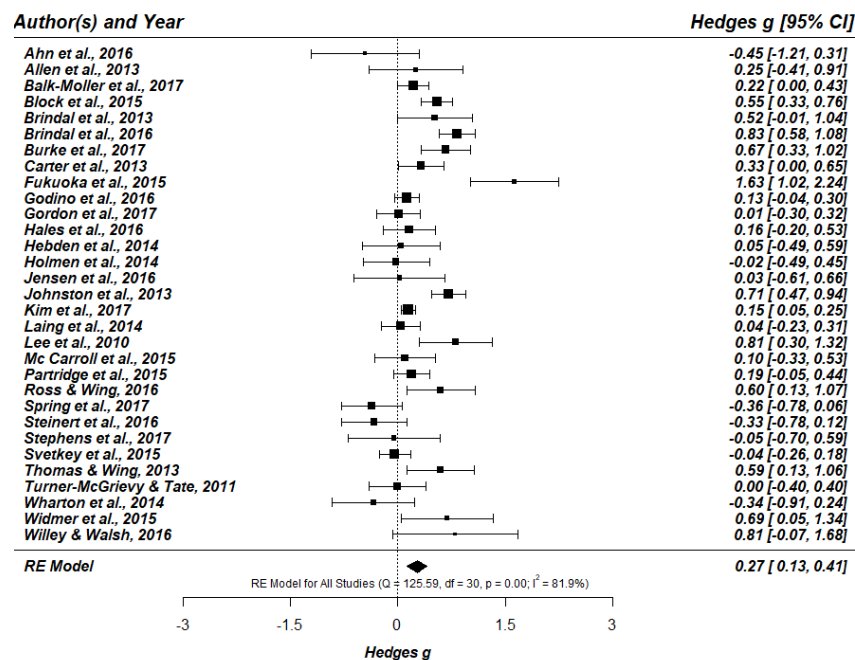

**Figure 13.4.** Forest plot showing the effects of app-based mobile interventions on body weight ( $k = 31$ , outcome  $n = 39$ ; adjusted data set).

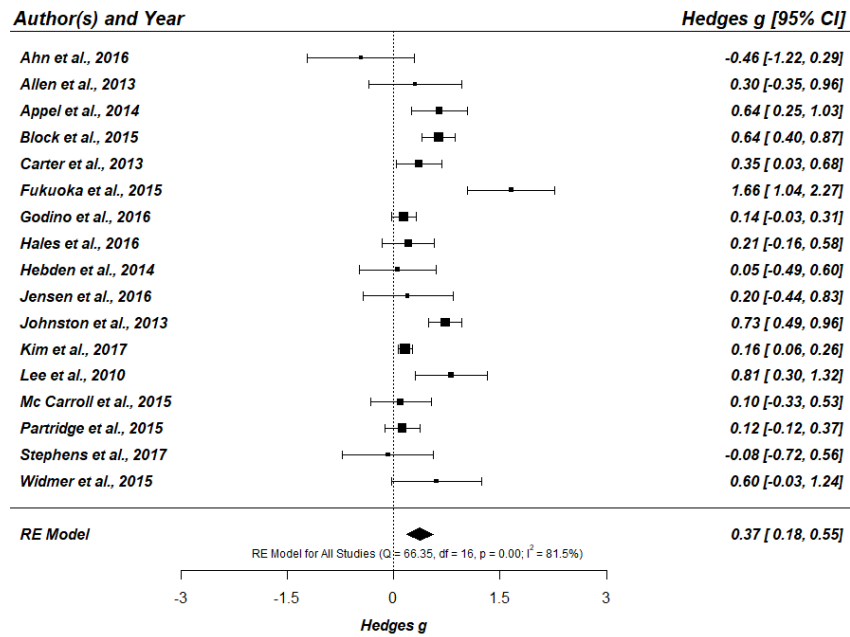

**Figure 13.5.** Forest plot showing the effects of app-based mobile interventions on BMI ( $k = 17$ , outcome  $n = 21$ ; adjusted data set).

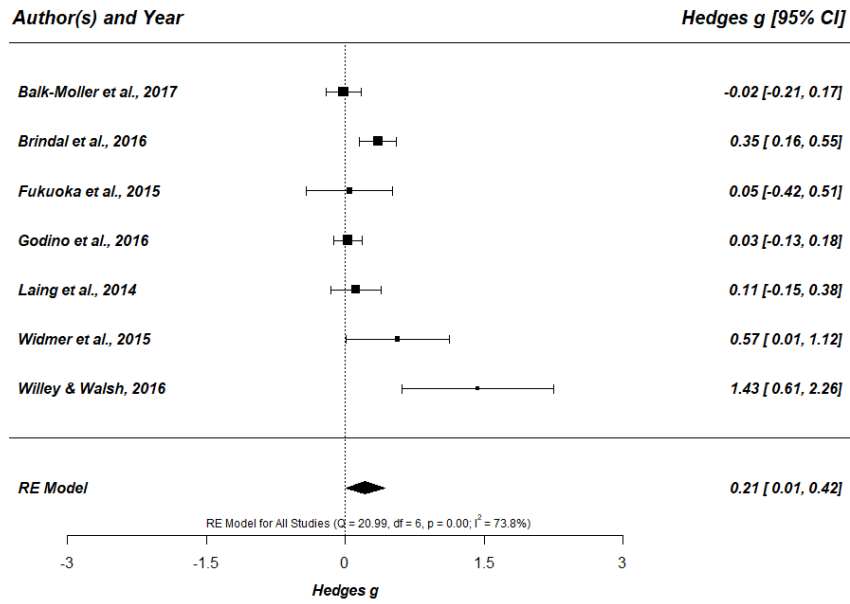

**Figure 13.6.** Forest plot showing the effects of app-based mobile interventions on blood pressure ( $k = 7$ , outcome  $n = 19$ ; adjusted data set).

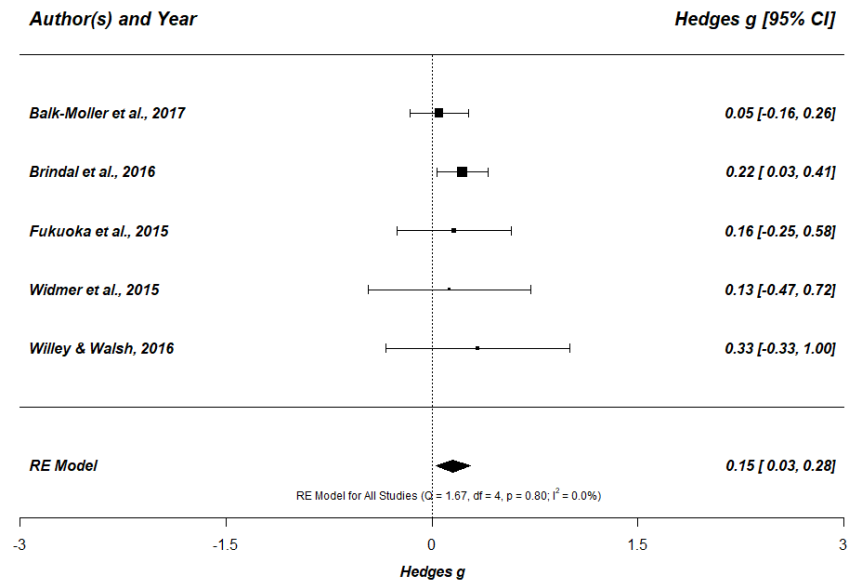

**Figure 13.7.** Forest plot showing the effects of app-based mobile interventions on blood lipids ( $k = 5$ , outcome  $n = 22$ ; adjusted data set).

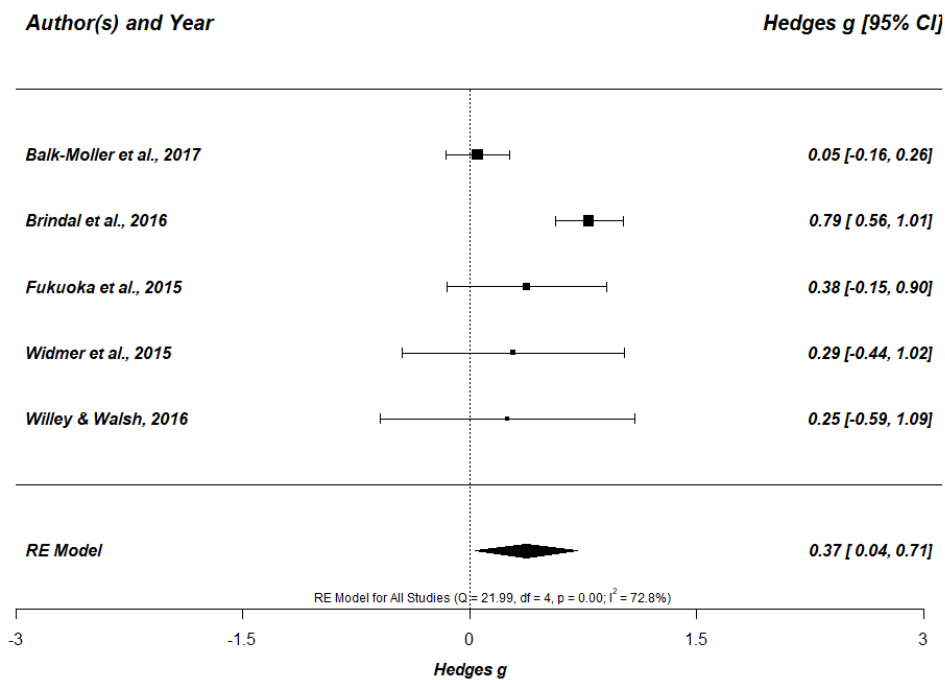

**Figure 13.8.** Forest plot showing the effects of app-based mobile interventions on cholesterol ( $k = 5$ , outcome  $n = 7$ ; adjusted data set).

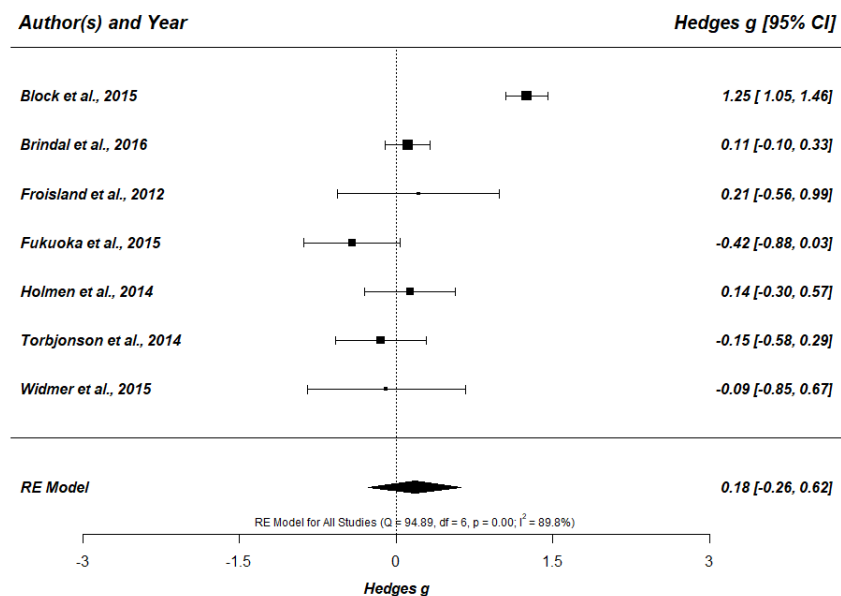

**Figure 13.9.** Forest plot showing the effects of app-based mobile interventions on blood sugar ( $k = 7$ , outcome  $n = 10$ ; adjusted data set).

## Supporting Information 14

Weighted mean differences for BMI and body weight

Table 14.1

Weighted mean differences for BMI ( $\text{kg}/\text{m}^2$ ) for the intervention group ( $k = 13$ )

|                         | <b>Difference<br/>(BMI points)</b> | <b>Weights</b> | <b>Weighted mean<br/>difference<br/>(BMI points)</b> |
|-------------------------|------------------------------------|----------------|------------------------------------------------------|
| Ahn et al., 2016        | 0.21                               | 3.50           | 3.71                                                 |
| Allen et al., 2013      | -1.22                              | 4.11           | -5.01                                                |
| Appel et al., 2014      | 0.08                               | 6.27           | 0.50                                                 |
| Carter et al., 2013     | -1.60                              | 6.89           | -11.02                                               |
| Fukuoka et al., 2015    | -2.00                              | 4.39           | -8.78                                                |
| Hales et al., 2016      | -1.41                              | 6.47           | -9.09                                                |
| Hebden et al., 2014     | -0.58                              | 4.96           | -2.88                                                |
| Kim et al., 2017        | -1.05                              | 8.54           | -8.97                                                |
| Lee et al., 2010        | -0.80                              | 5.22           | -4.18                                                |
| Mc Carroll et al., 2015 | -0.80                              | 5.92           | -4.74                                                |
| Partridge et al., 2015  | -0.90                              | 7.55           | -6.80                                                |
| Stephens et al., 2017   | -0.63                              | 4.21           | -2.63                                                |
| Widmer et al., 2015     | -1.20                              | 4.23           | -5.08                                                |
| <b>Mean</b>             | <b>-0.92</b>                       |                | <b>-0.90</b>                                         |

*Note.* Includes intervention studies specifying absolute mean difference in BMI points ( $\text{kg}/\text{m}^2$ ) for the intervention group. Out of 17 studies reporting BMI changes (see Supporting Information 13.5), one was excluded due to outlier values (Block et al., 2015) and three did not report within BMI changes (Godino et al., 2016, Jensen et al., 2016 and Johnston et al., 2013), and thus, they were not included.

Table 14.2

Weighted mean differences for body weight in kilograms for the intervention group ( $k = 29$ )

|                           | <b>Difference (kg)</b> | <b>Weights</b> | <b>Weighted mean difference (kg)</b> |
|---------------------------|------------------------|----------------|--------------------------------------|
| Ahn et al., 2016          | 0.64                   | 1.95           | 1.25                                 |
| Allen et al., 2013        | -3.56                  | 2.27           | -8.08                                |
| Balk-Moller et al., 2017  | -1.24                  | 4.15           | -5.15                                |
| Brindal et al., 2016      | -5.88                  | 4.02           | -23.64                               |
| Burke et al., 2017        | -2.79                  | 3.59           | -10.02                               |
| Carter et al., 2013       | -4.60                  | 3.70           | -17.02                               |
| Fukuoka et al., 2015      | -5.70                  | 2.42           | -13.79                               |
| Godino et al., 2016       | -0.52                  | 4.32           | -2.27                                |
| Gordon et al., 2017       | -0.20                  | 3.76           | -0.77                                |
| Hales et al., 2016        | -3.75                  | 3.49           | -13.09                               |
| Hebden et al., 2014       | -1.60                  | 2.72           | -4.35                                |
| Holmen et al., 2014       | -1.30                  | 3.03           | -3.94                                |
| Jensen et al., 2016       | 0.09                   | 2.35           | 0.20                                 |
| Johnston et al., 2013     | -4.60                  | 4.07           | -18.72                               |
| Kim et al., 2017          | -2.98                  | 4.50           | -13.41                               |
| Laing et al., 2014        | -0.03                  | 3.93           | -0.12                                |
| Lee et al., 2010          | -1.90                  | 2.84           | -5.40                                |
| Mc Carroll et al., 2015   | -2.30                  | 3.21           | -7.38                                |
| Partridge et al., 2015    | -1.90                  | 4.02           | -7.64                                |
| Ross & Wing, 2016         | -5.22                  | 3.01           | -15.71                               |
| Spring et al., 2017       | -3.97                  | 3.23           | -12.81                               |
| Steinert et al., 2016     | 0.50                   | 3.10           | 1.55                                 |
| Stephens et al., 2017     | -1.80                  | 2.32           | -4.18                                |
| Svetkey et al., 2015      | -1.11                  | 4.15           | -4.62                                |
| Thomas & Wing, 2013       | -9.65                  | 3.03           | -29.24                               |
| Turner-McGr. & Tate, 2011 | -2.50                  | 3.35           | -8.38                                |
| Wharton et al., 2014      | -1.59                  | 2.57           | -4.09                                |
| Widmer et al., 2015       | -4.00                  | 2.32           | -9.28                                |
| Willey & Walsh, 2016      | -6.12                  | 1.63           | -9.98                                |
| <b>Mean</b>               | <b>-2.74</b>           | <b>-</b>       | <b>-2.69</b>                         |

*Note.* Includes intervention studies specifying absolute mean difference in body weight in kg (or lbs) for the intervention group. Out of the 31 studies reporting body weight changes (see Supporting Information 13.4), one was using a different metric (Brindal et al., 2013), and one was excluded due to outlier values (Block et al., 2015) and thus, they were not included.
